# Supplementary material
Source: PubMed Central journal article supplement (PMC10152674)
Supplement: kiad062_supplementary_data.pdf [file kiad062_supplementary_data.pdf]

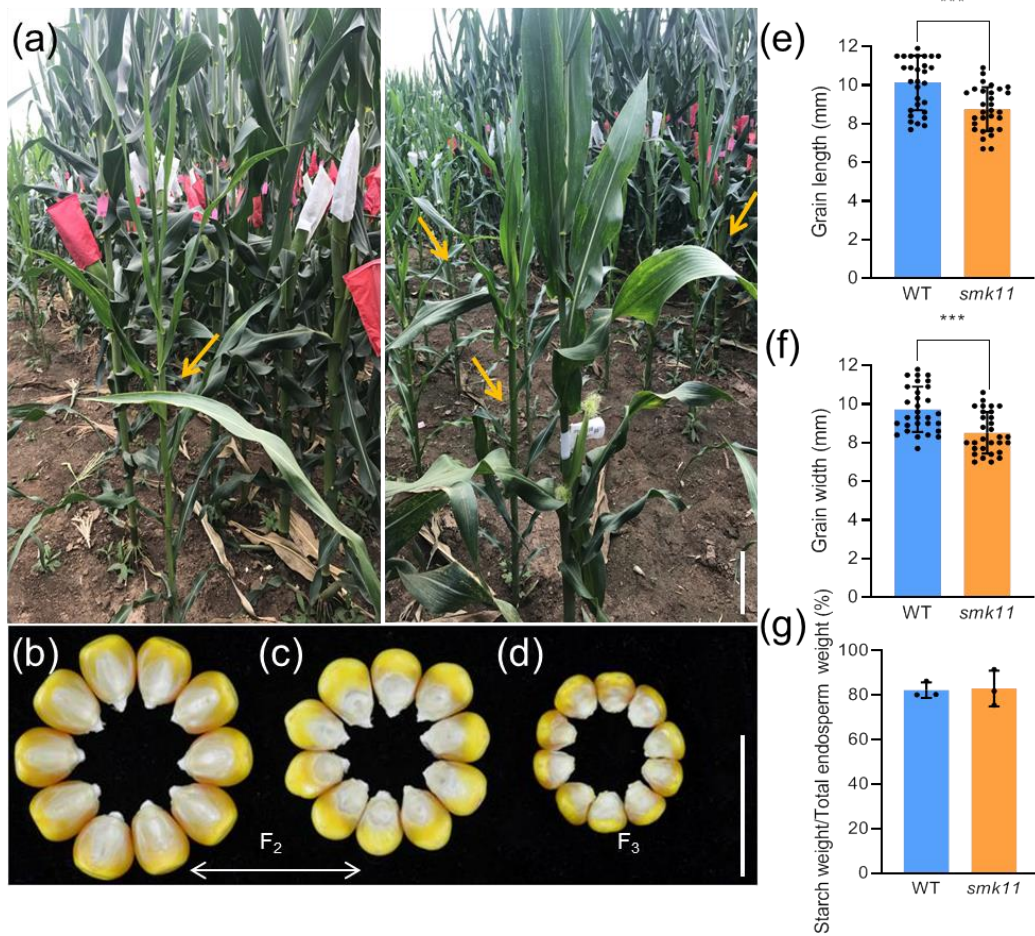

**Supplemental Figure S1 The homozygous *smk11* plants could produce small and inviable progeny.**

(a) WT and *smk11* mutant (orange arrows) plants at 70 days after planting. (b) Randomly selected mature WT kernels from the segregated F<sub>2</sub> population. (c) Randomly selected mature *smk11* kernels from the segregated F<sub>2</sub> population. (d) The selfed progenies of homozygous F<sub>2</sub> mutant kernels at maturity. (e-g) Comparison of grain length (n=30 seeds) (e), grain width (n=30 seeds) (f), and starch content (n=3 ears) (g) between WT and *smk11* kernels. Values are the average ± S.E. (\*\*\*)  $p < 0.001$ , Student's *t*-test). Scale bars=10 cm (a) ; 2 cm (b-d).

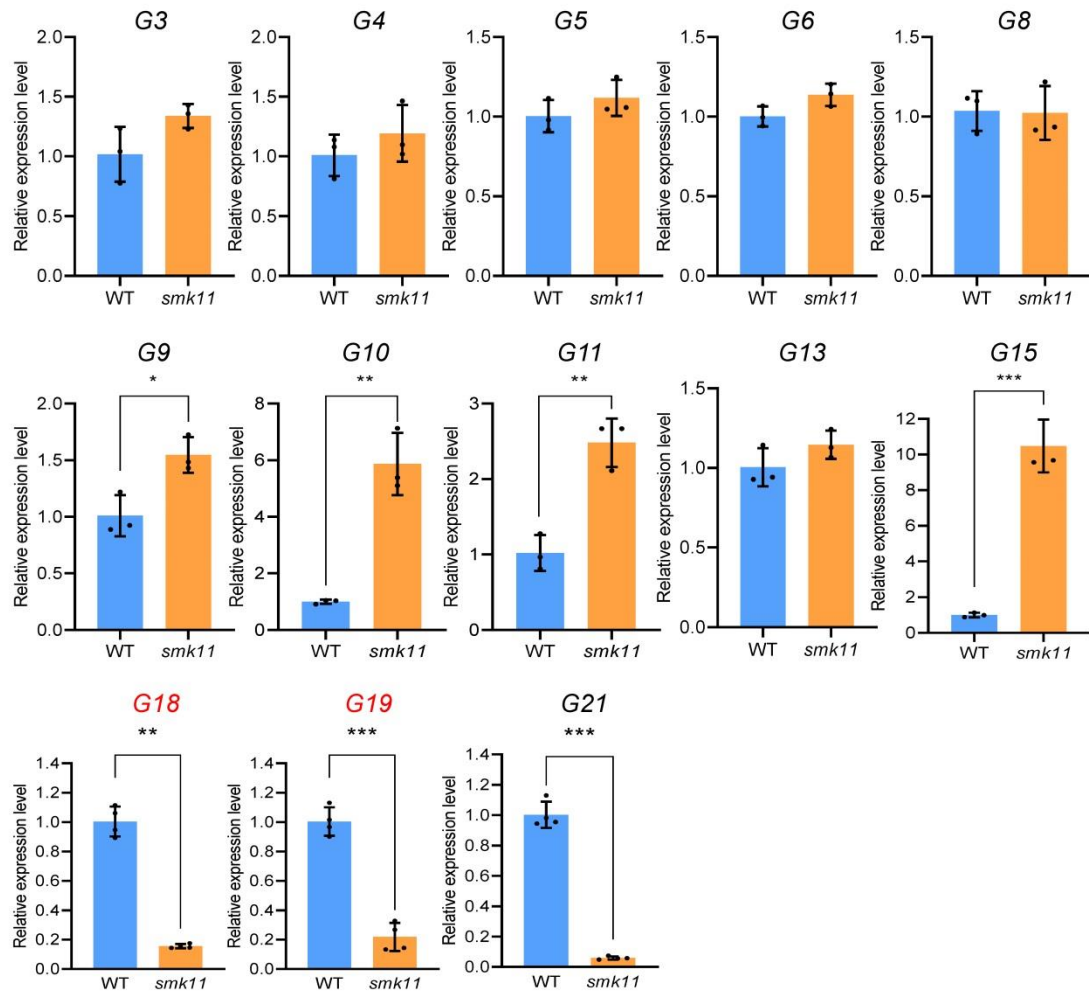

**Supplemental Figure S2 RT-qPCR analysis of 13 expressed genes in candidate interval.**

*ZmActin* was used as an internal control. Data are the average  $\pm$  S.E. of three biological replicates. (\*  $p < 0.05$ , \*\*  $p < 0.01$ , \*\*\*  $p < 0.001$ , Student's *t*-test).

GCATGTGAAAGCTGAACCACATATTTGGAAGCAATTGAGATCCTGGAGGAATCATTGGACCTGATGATATACGG  
GTTGGAAGAAGCTGCATAGTCTTGAATATGCTATCATCTTCAACTCAAGCTTACTCAAGCCCAGACATGTTATG  
AGCGTGCTTTGAAGATAGAAGGACGTGTTCTGGGGTTGGTCACCCAGAGTATTCAAGTACAATGTACAGTCTAGC  
CAAGGTGCTCAGTCTACAAGGAAAAAGAAAAATGCAGAATGCCTTATTGAAGAGTCTATTAGAATACTTGAGGAA  
GCTGGGCTTGGCGATTCACTAACATGTTTACGAAGAATGGTCTCTCTCTCTAGAGAGTTAATAAAATCAAGACGAT  
TTGCTGAAGCTGAAATCTGGCAAAGGAAGATATTACATGTTCTGGAGCTTTCAGAGGGATGGGATTCATTGGTCAC  
TGCACGTGCAGCTGAACCTCTAAGTTTAAATCTTGAAACCATGGAGAAGTTGAAGGAATCAGAAGAGCTATTGGAA  
CGATGCCCTTGCAAGTCAAGAAAAAGATTCTACCTGAAGATCATCTTCAGGTAGCTTATACGTTGGTACACCTGGCAA  
GGTTAACATTGCACAGAGTTGTAAAGGATCGGGATGTAAACAGCGATGTAACGCATATTACCTCGCAAAAAGCAAA  
ACAGTTCAGCAATGATTCAATCAGGATTACAGAAGGACAATTAATTCCTTCAAGAAAAGATCAGAATAAAATTAAC  
AACACATCAACTGCAGATACAGATAAGAGTGCAGCAATAATCTTTTTCAAGCACTTCATGTTTTGGACTCATTG  
ATATTGCAGCGAAGCAGTTGCTAGGGCAAGGGGAGCAAGACTATAAATCTGTTCAAGATGCTCTGCAGAAGTGTGT  
TTCACTTTACAAAGAGCCTCATAACGAAGGTTGGTAAAAATGCTGCCAAGCAGGACTACATGATATGCCTGACG  
AGCCTGATCGATATGGTTCAGAGCTTGTTCATTCCACACATACCGGGGTTCAGAGGATTGCTTTCGAGGGCCG  
AACAAATTTTAGGAGAGCTAGAAGAAGAGAGTACTAGGAAGAAGCAATGATACGTAGGAACCAACACCCATATGGG  
TGGAAGCATTGTTAATTGCAAGTTGTGAGCCATATATTTTTTCAGTTGGTCGAGATCGCCCACCTATATGGGTGG  
AAGCATTGTTTGACGAGGTGCTGAATCGAGTGACGGTTAAAGAGTTTAAATGCTTGTTCGCGCAGTGGTGTATG  
ACGTGGTCTTCAACAGAAAAAACCCTATAGTGAATCACTAGTGGAGGATCCGCGAAGGGCAATTCAGCA  
CACTGGCGGCCGTTACTAGTGGATCCGAGCTCGTACCCAG

**Supplemental Figure S3 The cDNA sequence of *LOC100192003* in inbred line B73 obtained using 3'RACE.**

The sequence highlighted in orange represents the location of inner primer, the letters highlighted in blue represent the stop codon, and the sequence underlined stands for 3' UTR.

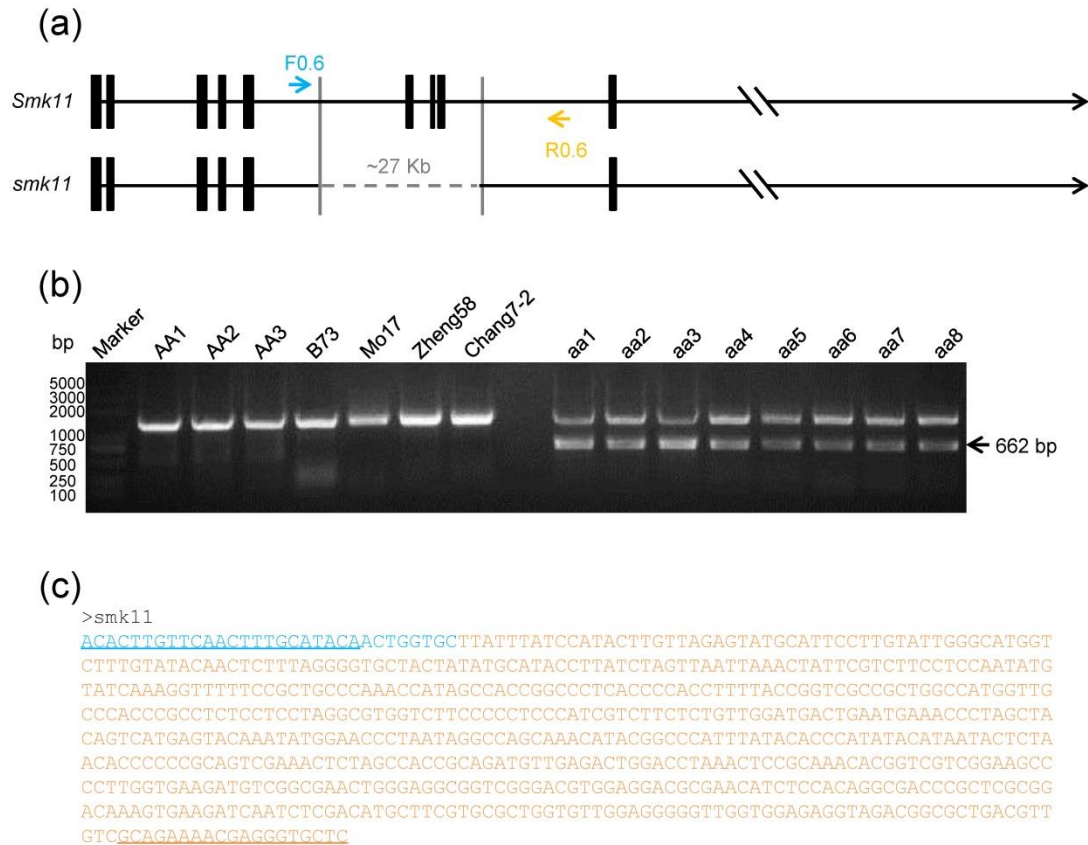

**Supplemental Figure S4 The sequencing conducted on the Pacific Bioscience Sequel II platform was confirmed by PCR amplification.**

(a) Diagram showing the gene structure of *Smk11* and *smk11*. The lines represent introns, the black boxes represent the first nine exons. The gray dashed line stands for the deletion fragment in *smk11*. The expected amplification product using specific primer pairs are indicated. (b) The validation of genotype in *Smk11* (wild type) and *smk11* mutant. Genomic DNA from homozygous WT kernels (AA1 to AA3 from three ears), B73, Mo17, Zheng58, Chang7-2, and eight homozygous mutants kernels (aa1 to aa8 from three ears) were extracted and amplified using primer pairs F0.6/R0.6. (c) The sequencing of 662 bp in Fig.S4b. The sequences underlined stand for the location of primer pairs. The letters highlighted in blue represent the 5' flanking sequence of the deletion, the letters highlighted in orange represent the 3' flanking sequence of the deletion.

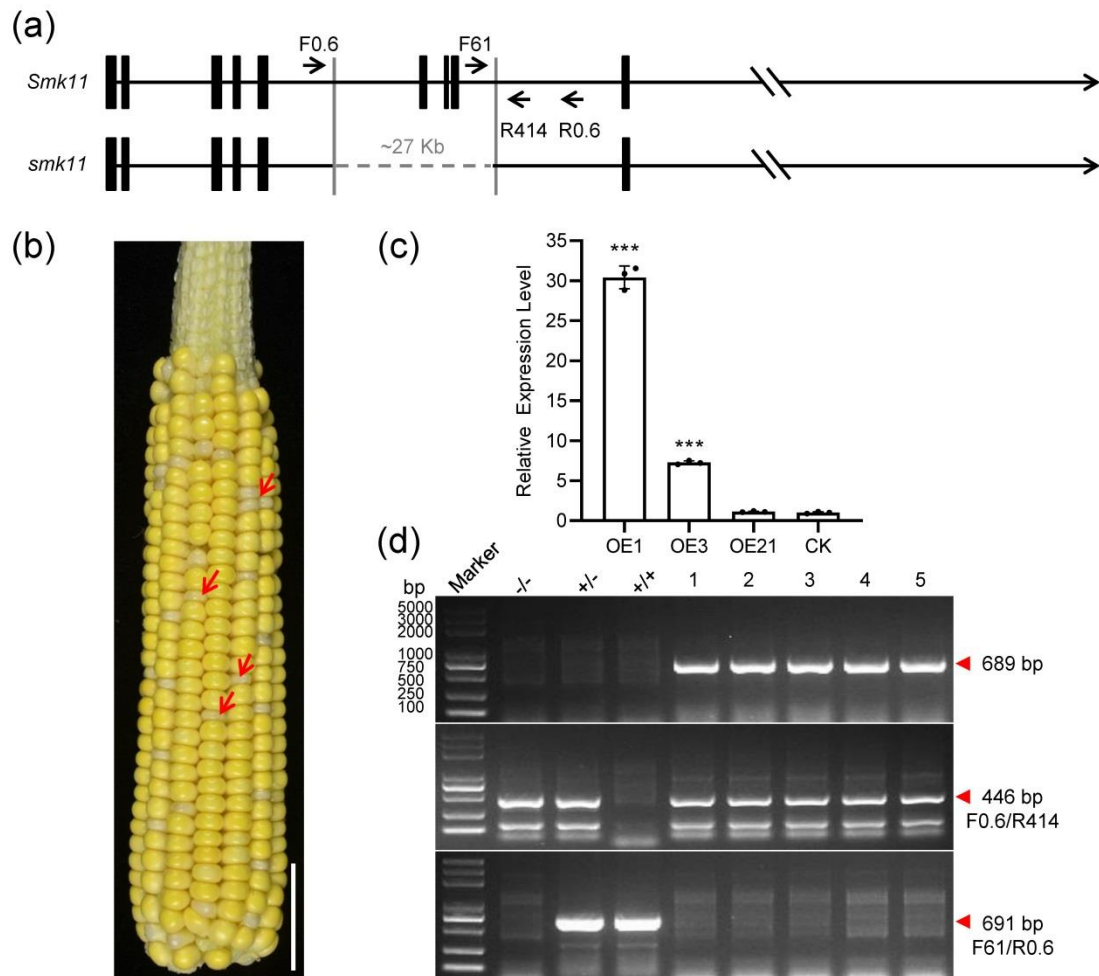

**Supplemental Figure S5 Functional complementation test of *smk11*.**

**(a)** Diagram showing the gene structure of *Smk11* and *smk11*. The lines represent introns, the black boxes represent the first nine exons. The gray dashed line stands for the deletion fragment in *smk11*. The expected amplification products using different primer pairs are indicated. **(b)**  $T_2$  ear of self-pollinated plants with heterozygous transgene and homozygous *smk11* mutant. Red arrows indicate the small kernels. Scale bar = 3 cm. **(c)** qRT-PCR analysis of *Smk11* gene in three independent transformants (OE1, OE3 and OE21). CK stands for non-transgenic maize used as a negative control. *ZmActin* was used as an internal control. Data are the average  $\pm$  S.E. of three biological replicates. (\*\*\*)  $p < 0.001$ , Student's *t*-test). **(d)** The transgenic lines ( $T_0$ ) were crossed to the homozygous mutant (*smk11/smk11*) and then self-pollinated to obtain  $F_2$  ears. Using the molecular markers linked to the *smk11* locus (F0.6/R414 and F61/R0.6) and the primers cross *Smk11* and *Nos* (Smk11-CX-F/Nos-R2), five containing homozygous *smk11* alleles and transgenic positive kernels were sorted out, a homozygous mutant (-/-) kernel, a heterozygous WT (+/-), and a homozygous WT (+/+) kernel were used as controls.



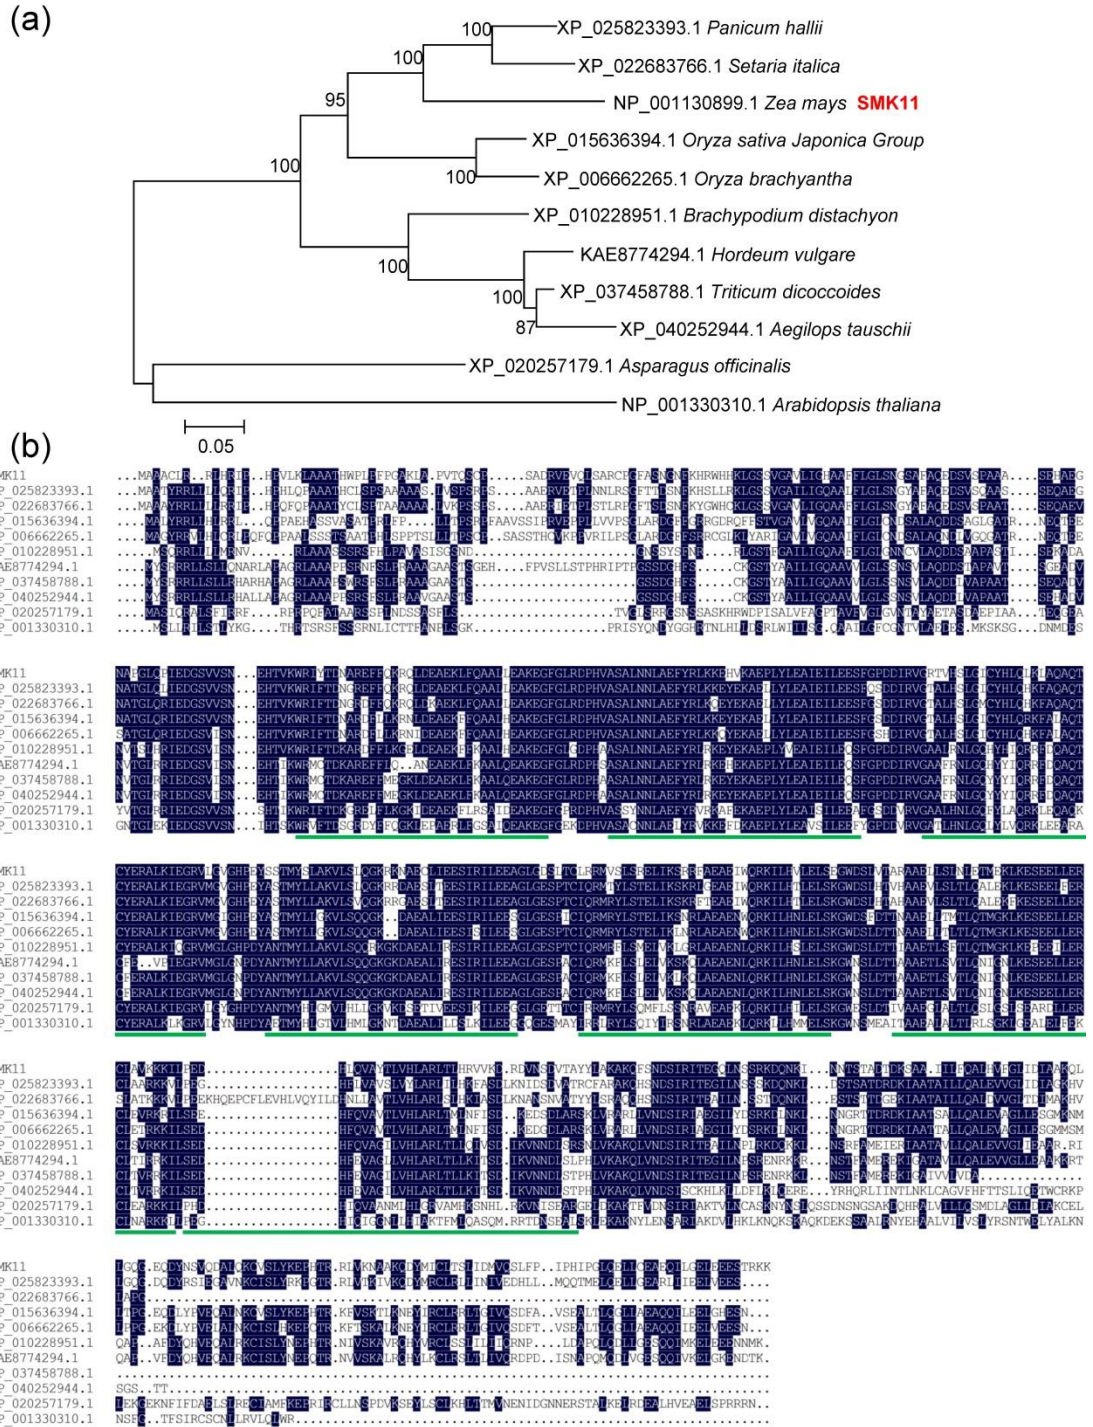

**Supplemental Figure S6 Phylogenetic relationships and amino acid alignment of SMK11 and its homologs.**

(a) The SMK11 protein and its homologs from NCBI were aligned by ClustalW, and the phylogenetic tree was constructed using MEGA 5.0 software. Distances were estimated with a neighbor-joining algorithm, and bootstrap support is indicated to the left of branches. Scale bar indicates the average number of amino acid substitutions per site. (b) The amino acid sequences of SMK11 homologs were downloaded from Phytzome v.12.1 (<https://phytozome.jgi.doe.gov>) and were aligned with DNAMAN. The TPR domains were highlighted with green lines.

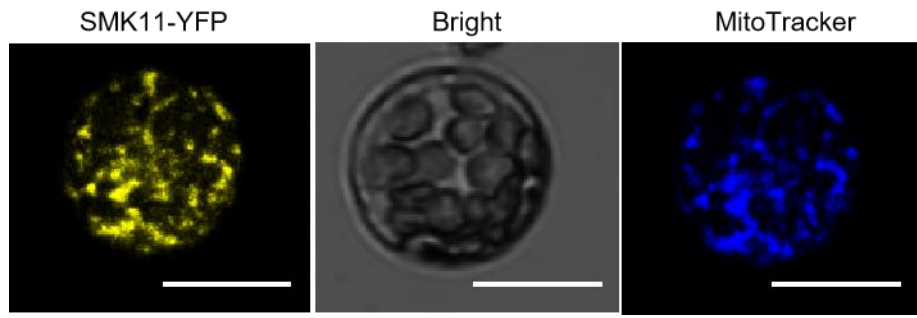

**Supplemental Figure S7 Localization of SMK11 in maize protoplasts.**

MitoTracker Red was used to label mitochondria. Scale bar = 10  $\mu\text{m}$ .

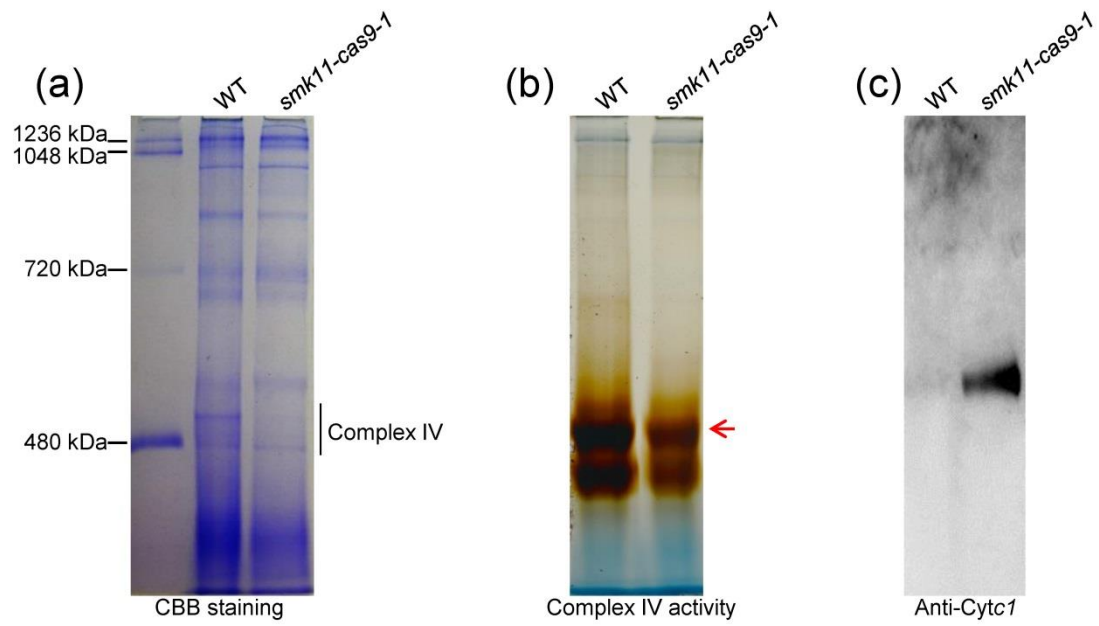

**Supplemental Figure S8 Impact on mitochondrial complexes in *smk11-cas9-1* kernels at 15 DAP.**

(a) BN (blue native) gel was stained with Coomassie Brilliant Blue (CBB). The position of mitochondrial complex IV is indicated. About 100  $\mu$ g of mitochondrial protein was loaded in each lane.

(b) BN gels were used for activity staining of complex IV. The position of mitochondrial complex IV is indicated in red arrow.

(c) BN gels transferring to PVDF membranes were probed with anti-Cytc<sub>1</sub> (a subunit of complex III).



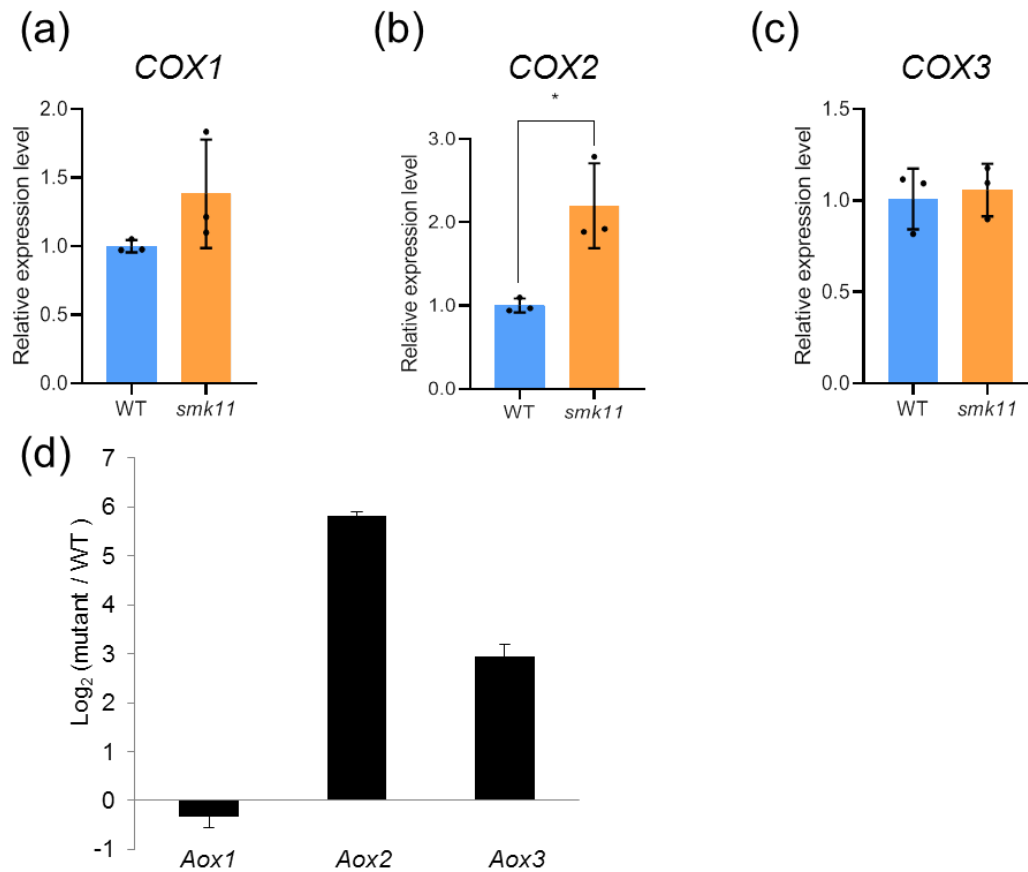

**Supplemental Figure S9 RT-qPCR analysis of *Cox1*, *Cox2*, *Cox3*, as well as *Aox1*, *Aox2*, and *Aox3* expression in *smk11* kernels at 15 DAP.**

(a) RT-qPCR analysis of *COX1* expression in *smk11* mutant. (b) RT-qPCR analysis of *COX2* expression in *smk11* mutant. (c) RT-qPCR analysis of *COX3* expression in *smk11* mutant. (d) RT-qPCR analysis of *Aox1*, *Aox2*, and *Aox3* expression in *smk11* mutant. *ZmActin* was used as an internal control. Data is the average  $\pm$  S.E. of three biological replicates. (\*  $P < 0.05$ , Student's *t*-test).

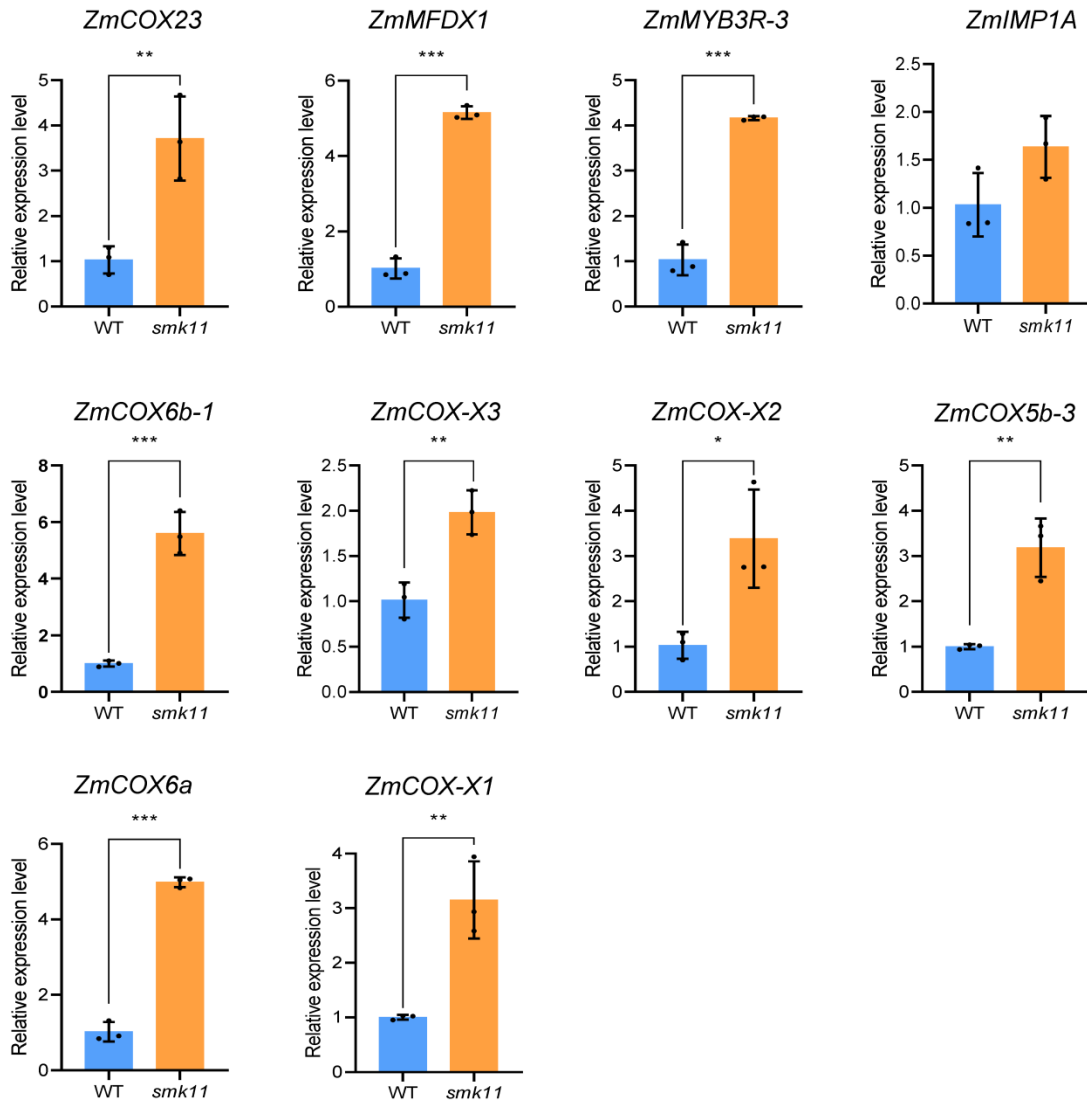

**Supplemental Figure S10 RT-qPCR analysis of the expression of four assembly factors and six subunits of complex IV.**

*ZmActin* was used as an internal control. Data are the average  $\pm$  S.E. of three biological replicates. (\*  $p < 0.05$ , \*\*  $p < 0.01$ , \*\*\*  $p < 0.001$ , Student's *t*-test).

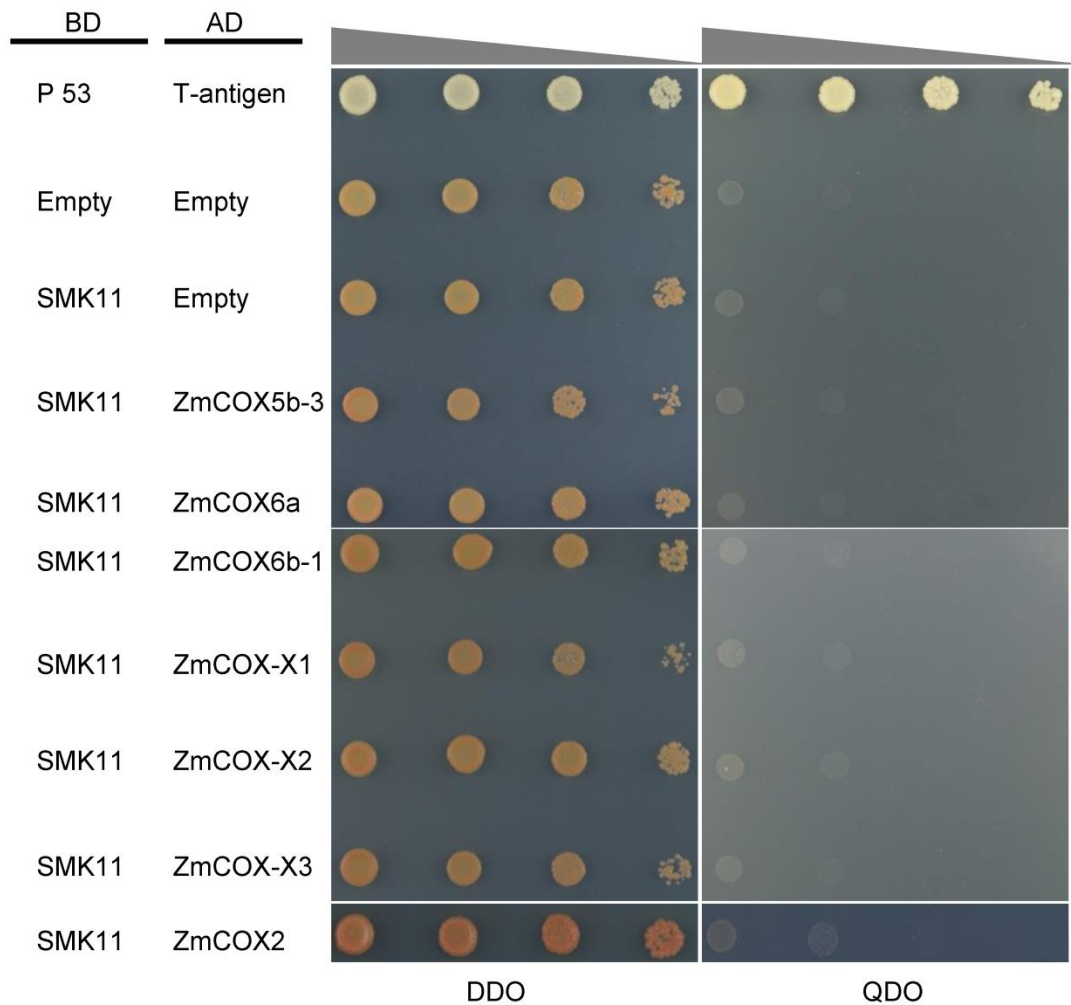

**Supplemental Figure S11 The SMK11 does not interact with the seven subunits of complex IV.**

Yeast two-hybrid (Y2H) analysis between SMK11 and the seven subunits (ZmCOX5b-3, ZmCOX6a, ZmCOX6b-1, ZmCOX-X1, ZmCOX-X2, ZmCOX-X3, and ZmCOX2) of complex IV. The Y2H Gold strain harboring the indicated bait and prey constructs were spotted on SD-Trp-Leu (DDO) and SD-Trp-Leu-His-Ade (QDO). The interaction between Human P53 and T-antigen was used as a positive control. AD, activating domain; BD, binding domain.

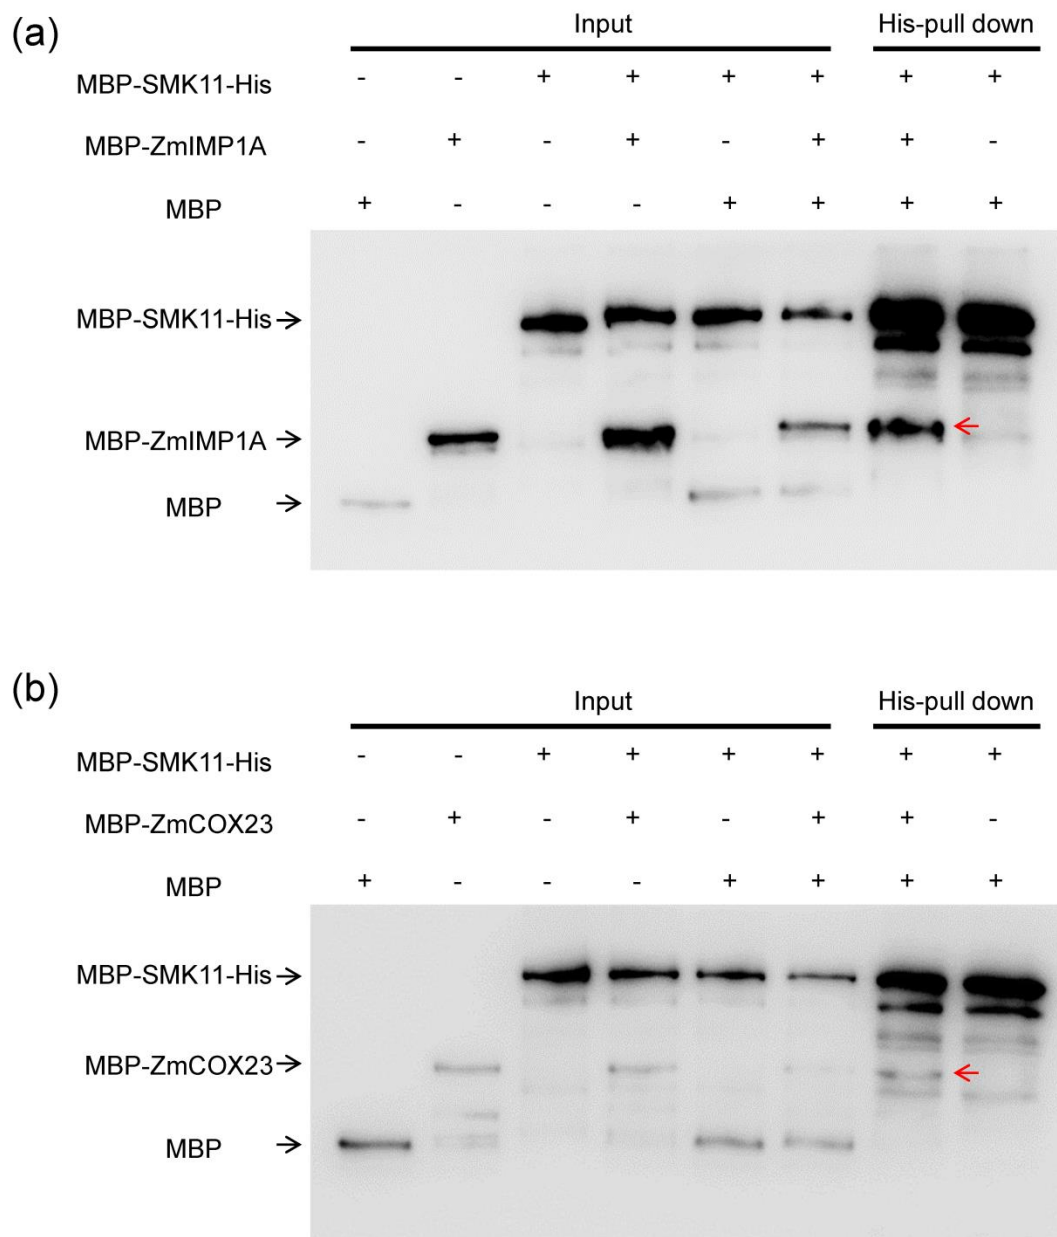

**Supplemental Figure S12 Recombinant protein MBP-SMK11-His interacts with MBP-ZmIMP1A and MBP-ZmCOX23, as determined using in vitro His pull-down assays.**

**(a)** Recombinant protein MBP-SMK11-His interacts with MBP-ZmIMP1A in vitro by His pull-down assays. **(b)** Recombinant protein MBP-SMK11-His interacts with MBP-ZmCOX23 in vitro by His pull-down assays. '+' and '-' indicate the presence and absence of the corresponding proteins in the reactions, respectively. Red arrows indicate the positions of interacting proteins.

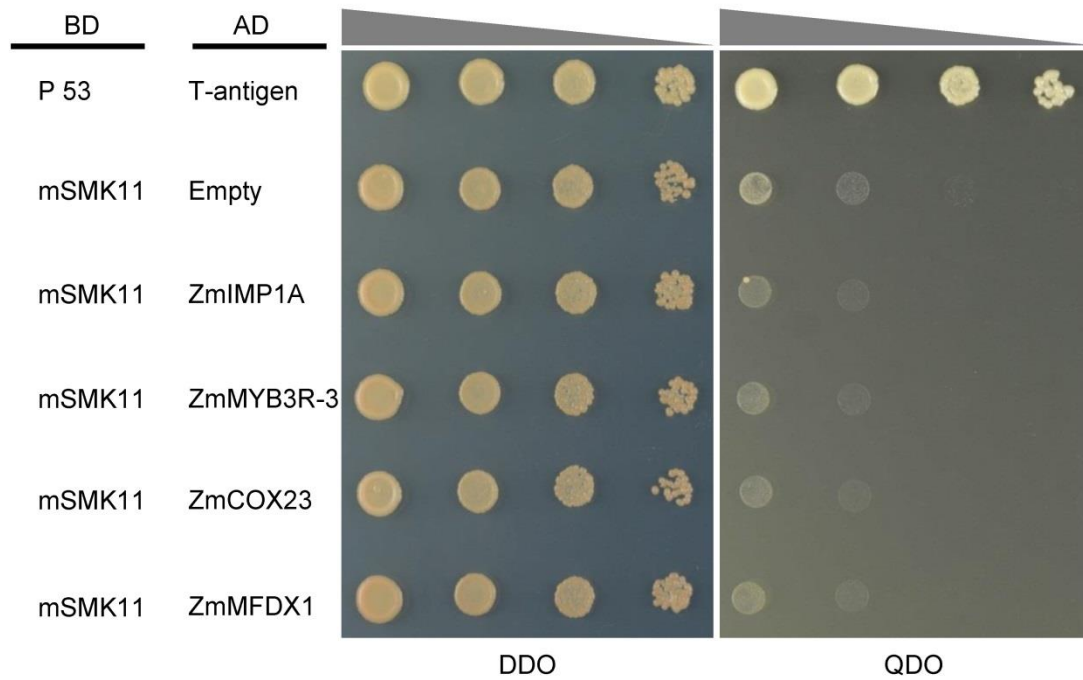

**Supplemental Figure S13 Mutation of SMK11 (mSMK11) could not interact with the four assembly factors of complex IV.**

Yeast two-hybrid (Y2H) analysis between mSMK11 and the four assembly factors (ZmIMP1A, ZmMYB3R-3, ZmCOX23, and ZmMFDX1) of complex IV. The Y2H Gold strain harboring the indicated bait and prey constructs were spotted on SD-Trp-Leu (DDO) and SD-Trp-Leu-His-Ade (QDO). The interaction between Human P53 and T-antigen was used as a positive control. AD, activating domain; BD, binding domain.



>Cox1-WT  
TATTCCAAAAATGAAATGACAAATCTGGTCCGATGGCTCTCTCCACTAACCCACAAGGATATCGGTACTCTATATTTTCATCTTCGGTGCATTCAGGAGTGATGGGCACATGCTTCTCCGT  
ACTGATTCGTATGGAATAGCCCGACCCGGCGATCAAAATCTTGGTGGGAATCATCAACTTTATAATGTTTTAATAACGGCTCACCGCTTTTTTAATGATCTTTTTATGGTTATGCCGGCGATG  
ATAGTGGATTTGGGAATGGTTTGTCCGATCTGTAGGTGCACCTGACATGGCATTTCCAGCATTAATAATAATATCAATCTCGTTGTGGCCAAAGTCTTTGGCTCTTAAGCTCAG  
CCTTAGTAGAAGTGGCAGCGGCACTGGGTGGACGGTCTATCCGCCCTTAAGTGGTATTACAGCCATCTGGAGGAGCAGTTGATTTAGCAATTTTAGTCTTCATCTATCAGGTGTTTCATC  
AATTTAGTCTCATCAATTTTAACTACTACTCTCAACATGCGTGGACCTGGAATGACTATGTCATAGATTCACCACTTTTTGTGGTCCGTTTTAGTGACAGCATTCCTACTTTTTATATCA  
CTTCGGTACTGGCAGGGCAATTAACATGTTTAAACCGATCGAACTTTAATACAACTTTTTTGTATCCAGAGGAGGGGGAGACCAATATATACAGCATCTCTTTGGTTCTTCGGTC  
ATCCAGAGGTATATTTCTCATTTCCGCTGGATTCGGTATTATAGTCAATCGTATCGACCTTTCAAGAAAACCGGCTTCGGGTATCTAGGCATGGTTATGCCATGATAAGTATAGGTGT  
TCTTGGATTTCTAGTTTGGGCTCATCATATGTTTACTGTGGCTTAGACGTTGATACGGGTCCTACTTCACCGAGCTACCATGATCATAGTCTGCCACTGGAATCAAAATCTTTAGTTGG  
ATCGCTACCATGGGGAGGTTGATACAATACAAAACACCCATGTTATTTGCTGAGGTTCACTTTTTGTTCACCATAGGAGGCTCACTGGAATAGTTTAGCAAACTCTGGCTAGACA  
TTGCTCATACATGATACTTATTATGTGGTGCACATTTCCATATATGACTTTCTATGGGAGCCGTTTTGCTTTTTTGTGGATTTTACTATTGGTGGGTAATACTTTGGTCGGACATATCC  
TGAACCTTAGGCCAAATCCATTTTGGATCACTTTTTTCGGGGTAACTGACCTCTTTCCATGCAATTTCTAGGGCTTCGGGTATGCCAGTCCGATCCAGATTAATCCAGATGCTTAC  
GCCGATGGAATGCTCTGAGCAGTTCCGGTCTTATATATACCGTAGTTGGGATTTGTGTTCTCTGATGTTGCGCAATCACTTAAGCAGTGGAAAAGAACAAAGATGTGGGAAAGTCTT  
GGGCTGTTGAGCAGAAATCAACCACTAGTAAGTGGTGGTACAAAGCCCTCCAGCCTTTTCATACTTTTGGAAGACTTCCAACTATCAAAAGAACTAGAAACCAATCCAGTTGCTAGAAATCCAT  
CATTAGCGAGACAAATATTTTTCTC  
>Cox1-smk11  
ACCCAAAAATGACAAATCTGGTCCGATGGCTCTTCTCCACTAACCCACAAGGATATCGGTACTCTATATTTTCATCTTCGGTGCATTCAGGAGTGATGGGCACATGCTTCTCCGTACTGATTCCG  
TATGGATTAGCCCGACCCGGCGATCAAAATCTTGGTGGGAATCATCAACTTTATAATGTTTTAATAACGGCTCACCGCTTTTTAATGATCTTTTTATGGTTATGCCGGCGATGATAGGTGGA  
TTTTGGAAATGGTTTGTCCGATTTCTGATAGGTGCACCTGACATGGCATTTCCAGCATTAATAATAATATCAATCTCGTTGTGGCCAAAGTCTTTAGTCTCCATTAAGCTCAGCCTTAGTAG  
AAGTGGCAGCGGCATGGTGGACGGTCTATCCGCCCTTAAGTGGTATTACAGCCATCTGGAGGAGCAGTTGATTTAGCAATTTTAGTCTTCATCTATCAGGTGTTTCATCAATTTTAGG  
TTCATCAATTTTAACTACTACTCTCAACATGCGTGGACCTGGAATGACTATGATAGATTAACCACTTTTTGTGGTCCGTTTTAGTGACAGCATTCCTACTTTTTAATATCACTTCCGGTA  
CTGGCAGGGGCAATTAACATGTTTAAACCGATCGAACTTTAATACAACTTTTTTGTATCCAGAGGAGGGGGAGACCAATATATACAGCATCTCTTTGGTTCTTCGGTATCCAGAGG  
TGATATTTCTCATTTCCGCTGGATTCGGTATTATAGTCAATCGTATCGACCTTTCAAGAAAACCGGCTTCGGGTATCTAGGCATGGTTATGCCATGATAAGTATAGGTGTTCTGGATT  
TCTAGTTTGGGCTCATCATATGTTTACTGTGGGCTTAGACGTTGATACGGTGCCTACTTCACCGAGCTACCATGATCATAGCTGTGCCACTGGAATCAAAATCTTTAGTTGGATCGCTACC  
ATGTTGGGAGGTTGATACAATACAAAACACCCATGTTTGTGCTGATAGGTTTCATCTTTTTGTTCACCATAGGAGGCTCACTGGAATAGTTCTAGCAAACTCTGGCTAGACATGCTCTAC  
ATGATCACTTATATGTTGGTGCACATTTCCATTTATGACTTTCTATGGGAGCCGTTTTGCTTTTATTTGCTGGATTTTACTATTGGTGGTAAATCTTTGGTGGACATATCTGAAACTTT  
AGGCAAATCCATTTTGGATCACTTTTTTCGGGGTAACTGACCTCTTTCCCATGCAATTTCTGAGGCTTCGGGTATGCCAGTCCGATCCAGATTAATCCAGATGCTTAGCCGGATGG  
AATGCTCTGAGCAGTTCCGGTCTTATATATCCGATTTGGATTTGTGTTCTCTGATGTTGCGCAATCACTTAAGCAGTGGAAAAGAACAAAGATGTGGGAAAGTCTTCGGGAAAGTCTTGGGCTGTTG  
AGCAGAAATCAACCACTAGTAAGTGGTGGTACAAAGCCCTCCAGCCTTTTCATACTTTTGGAAGACTTCCAACTATCAAAAGAACTAGAAACCAATCCAGTTGCTAGAAATCCATCATTAGCGA  
GACAATATTTCTCTTCG

>Cox2-WT  
AAAAGAGATCTTTAATACGACTCACTATAGGGCAGCGCCGCTATGGAGTACCCATACGACGTACCAGATTACGCTCATATGGCCATGGAGGCCAGTGAATTCATGATCTTCGTTTATTAGAA  
TGTCGATTTCTCACAATCGCTCTTTTGGATGCTCGGCAACCATGGCAATTAGGATTTCAAGACGCAAGCAACCATATGATGCAAGGAATCATTGACTTACATCAGCATATCTTTTTCTCCCTCA  
TTCGATTTTGGTTTTCCGATATATGGATGTTGGTTCGGCTTTATGGGATTTCAACAGCAAACTAAATCCAAATCCCGCAAAGGATTTGTCATGGAACTACTATCGAAATATTTGGACCATTTT  
TCCATAGTGCATCTTATGTTTACTGTCATACCATCGTTTCTCTGTTATATCAATGACGGGCTATTAGTAGATCCAGCCATTAATCAAAAGTATTGGACATCAATGGTATTTGGACTAT  
GAGTATTCGGACTATACAGTTCGATGTAACATCGCTGATGACTTTCAGCATTTATAGGCTTTCAGAGATGATTTAGAAATGGGTCAATACGTTTATAGAAATGACAAATGAGTGGTGTGATC  
GACCCAAACTCATCTACGATGATTTGTAACATCCGCTGATGACTTTCATAGTTGGGCTGACTTCCCTTAGGTGTCAAATGATGCTGTACCTGCTTTAAATCTTTACCTCCATCTTCCGTTCCG  
ACAACGAGAAGGAGTTTACTATGTCAGTGCAGTGAGATTTTGGGAATTAATCATGCTTTTGGCTATCTGCTGATAGGCTGGGTATCCAAATCAATTAATCTCCAAACCAACTAGGATCCA  
TCCAGCTCCGAGCTGCAGTGAATCTGTAGTACTGAAAACCCCGCAAGTTCACTTCACTGTCGACCATCTCAATTTCTTTTCATTTATACA

>Cox2-smk11  
GAACCTCGAGTACATACGACGTACCAGATTACGCTCATATGGCCATGGAGGCCAGTGAATTCATGATCTTCGTTTATTAGAAATGTCGATTCTTCACAATCGCTCTTTGTGATGCTCGGAAAC  
CATGGCAATTAGGATTTCAAGACGCAAGCAACCATATGATGCAAGGAATCATTGACTTACATCAGCATATCTTTCTCCATCTGATTTGGTTTTCGATATAGGATTTGGTTTCGGCT  
TTTTATGGCATTTCAACGAGCAAACTAATCCAAATCCCGCAAAGGATTTCTCATGGAACACTATCAAGAAATATTGGACCATTTTCCATAGTGCATTTCTATTGTCATTTGTCATATACCATCGTT  
GCTCTGTTATATCAATGGCAGGGTATTAGTAGATCCAGCCATTAATCAAAAGTATTGGACATCAATGGTATTGGACTTATGATTTTCGGACTATAACAGTTCCGATGAACAGTCACTCA  
CTTTGACAGTATATGATTTCCAGAAGATGATTTAGAAATGGGTCAATACGTTTATTAGAAATGACAAATAGAGTGGTTTACAGCCAAAACCTATCTACGATGATTTGTAACATCCGCTGA  
TGATCTCATAGTTGGGCTGACCTTCTTCCATAGGTCAAATGATGCTGTACCTGCTGTTAAATCTTACCTCCATCTTGGTACAACGAGAAGGAGTTTACTATGGTCAGTGCAGTGAAT  
TGTGGAATTAATCATGCTTTATGCTATCGTCTAGAAAGCAGTGACTTTGAAAGATTAATGCGGATTTGGGTATCCAAATCAATTAATCTCCAAACCAACTAGGATCCATCGAGCTCGAGCTGC  
AGATGAATCGTAGATACTGAAAACCCCGCAGTTCACTTCAACTGTGACATCGTGCACATCTCAATTTTCATTTATACATCGTTGGCTCTTTATGATATACTCCCTTAGTCAATCTGGGCT  
ATGTAACC

>Cox3-WT  
ATTGGGGTTTTTTTTGTTTACCATACAACCGGGGCAAGTGGTTTATGATTGAATCTCAGAGGCATCTTATCATTGGTAGATCCAAGTCCATGGCCTATTTCGGGTTCACTTGGAGCTTTGG  
CAACCACTTAGGAGTGTGATGATCACTGACTCATTTCAAGGGGTCGCAACACTTCCAGTTTGGGCTTAATATTTCTCCCTTATACCATGTTGATGTTGGCGGATGTTCTACCTGAATC  
CAGCTTGAAGGGCAATCAACAAAAGCTGACAAATAGGACTTCGATATGGTTTTATCTCTTCATAGTCTCGGAGGTTATGTTCTTTTTTGGCTTTTTTTGGGCTTTTTTCATCTCTTTT  
GCACCTACGGTAGAGATCGGAGGATTTTGGCCCCAAAAGGATTTGGGGTTTTAGATCCTTTGGGAAATCCCTCTCTTAAATACCTTATCTCTCTTTCATCCGGAGCTGCCGTAACCTTGGGCTC  
ATCATGCTATATCTCGGGGGAAGAAAACGAGCAGTTTACGCTTTAGTAGCAACCGTTTTACTGGCTTAGTATTCACTGGCTTTCAAGGAATGGAATATTACCAAGCACCTTCACTATTTTC  
GGATAGTATTTATGGTTCACTTTTCTTAGCAACTGGCTTTCATGGTTTCAATGATGATAGGACTCTTTCTTGTATGATGTTGATTTCCGCAATATCTGTCATCTGACCAAGAAAG  
CATCACTTTGGCTTTGAAGCAGCTGCTGATGACTGGCATTTGTAGACGTTGGTTTGGTTATTCCTATTTGCTCTTATTTATGTTGGGAGGTATATGAAGAAAGGACGATAAAGTGGGGATT  
>Cox3-smk11  
TTTTGTTTCCAAACCCCGGGGCAAGTGGTTTATGATTGAATCTCAGAGGCATCTTATCATTGGTAGATCCAAGTCCATGGCCTATTTCGGGTTCACTTGGAGCTTTGGCAACCCGCT  
AGGAGTGGTGTACATGCACTATTTCAAGGGGTCGAACACTTCTCAGTTTGGGCTAATATTTCTCCTTTATACCATGTTGATGTTGGCGGATGTTCTACGTGAACTCCAGCTGGAA  
GGCATATACAAAAGCTGACAAATAGGACTTCGATATGTTTATTTCTCTTCATAGTCTCGGAGGTTATGTTCTTTTTGCTTTTTTTGGCTTTTTTTTCATCTCTTTCGGACCTTAGCG  
TAGAGATCGGAGGTTATTTGGCCCCAAAAGGGATTTGGGGTTTATGATCCTTGGGAAATCCCTCTCTTAAATACCTTATTTCTCTTTCATCCGGAGCTGCCGTAACCTTGGGCTCATCATGCTAT  
ACTCGGGGGAAGAAAACGAGCAGTTTACGTTTATAGTAGCAACCGTTTTACTGGCTAGTATTCATGGCTTTCAAGGAATGGAATATTACCAAGCACCTTCACTATTTCCGATAGTAT  
TATGTTTCTACCTTTTCTTAGCAACTGGCTTTCATGGTTTTCATGATTTATAGGACTCTTTCTTGTATGATGTTGATTTCCGCAATATCTTGGTCACTGACCAAGAAAGCATCAGCTT  
GCTTTGAACGAGTGCATGGTACTGACTGATTTGTAGACCTGGTTGGTTATTCCTATTTGCTCTTATTTATGTTGGGAGGTATATGAAGAAAGGACGATAAAGGGGATTTGAAACC

**Supplemental Figure S14 Sequence analysis of *Cox1*, *Cox2* and *Cox3* transcripts in WT and *smk11*.**

**Supplemental Table S1. Primers used in this study.**

| Primer name   | Primer sequence 5'-->3'   | Use for                      |
|---------------|---------------------------|------------------------------|
| umc2578-F     | CGGAAGGGAGAACTTGTTACGTT   |                              |
| umc2578-R     | GATGCCGTCGTCCTTTTCTG      |                              |
| umc2035-F     | ACCACA ACTACTACGGCCGAAAC  |                              |
| umc2035-R     | ACTGTTGCTGGTACGAAGAGTTCC  |                              |
| umc1048-F     | TGCGCTGTTTCCTACTCAGACTAA  |                              |
| umc1048-R     | AAGACAAGTCCAGTGACGAAGAGC  |                              |
| umc2294-F     | ATTGGAGTGGCTCCATTGCTT     |                              |
| umc2294-R     | CCCACCATTCTATATATTGTTGCCA |                              |
| ID24.160-F    | GAAAGAAGGTAGATGTGAGGCA    |                              |
| ID24.160-R    | ACCGTTCGACCAAGCTAACT      |                              |
| ID26.019-F    | TGTCGTGTAACCTAAGATGCAC    | Map-based cloning of         |
| ID26.019-R    | CCCAATCAATACAGCAGCGT      | <i>Smk11</i>                 |
| ID27.495-F    | AAGTCCCCTTGTTGATGCAA      |                              |
| ID27.495-R    | ACCATAGTTTAGAGTTCCAGCAA   |                              |
| ID27.884-F    | CAGCAAGCAACTCTCGCAAT      |                              |
| ID27.884-R    | CAGCAGGCAGGAAAACGATG      |                              |
| SNP074239-F   | AGATAAGGCTGAACAGAACCT     |                              |
| SNP074239-R   | ACCAGATTATGATTCGAGACCA    |                              |
| SNP305415-F   | AGGAGCATTGTTGGGAGGGTC     |                              |
| SNP305415-R   | CCCGAAGTGCTAGTGGATCT      |                              |
| SNP035779-F   | GCATCTCTTTCTTACTTAGTCAGCA |                              |
| SNP035779-R   | GGTTGCCAGGATGACGTG        |                              |
| 3RACE-Outer-F | CGAACACACGGTCAAATGGA      | Amplification of full-length |
| 3RACE-Inner-F | GCATGTGAAAGCTGAACCAC      | <i>Smk11</i> transcripts     |

|                |                                            |                                                                                           |
|----------------|--------------------------------------------|-------------------------------------------------------------------------------------------|
| SMK11-MT1-BsF  | ATATATGGTCTCTGGCGGCTGCGGCGAGCTTAAGGACGTT   | Construct<br>pBUE411-2gRNA-Smk11<br>vector                                                |
| SMK11-MT1-F0   | CGGCTGCGGCGAGCTTAAGGACGTTTTAGAGCTAGAAATAGC |                                                                                           |
| SMK11-MT2-R0   | AACGTGCCAAGTTGGCTCCGGTCCGCTTCTTGGTGCC      |                                                                                           |
| SMK11-MT2-BsR  | ATTATTGGTCTCTAAACGTGCCAAGTTGGCTCCGGTCC     |                                                                                           |
| 35S-Smk604-inF | GGACTCTTGACCATGGCCGCCGCCTG                 | Construct<br>p3301-35S-Smk11 vector<br>RT-PCR analysis of<br><i>Smk11</i> gene expression |
| 35S-Smk604-inR | ATTCGAGCTGGTCACCTCATTGCTTCTTCCTAGTACTCTCT  |                                                                                           |
| Smk604-F       | CACCCTCAGTCCCCACATG                        |                                                                                           |
| Smk604-R       | ATGGGTGTTGGTTCCTACGT                       |                                                                                           |
| ZmAox1-qF      | CCTATTGGACCGTCAAATTACTGC                   | qRT-PCR analysis of <i>Aox</i><br>gene expression                                         |
| ZmAox1-qR      | CACTGTTTCCAGCATCATAGCAC                    |                                                                                           |
| ZmAox2-qF      | CCAAGACGCTGATGGATAAGGT                     |                                                                                           |
| ZmAox2-qR      | CCACGGTTTCCAGCATCAT                        |                                                                                           |
| ZmAox3-qF      | CGGCACCGAGAAGCATGA                         |                                                                                           |
| ZmAox3-qR      | CTGGTCCACTTCCACTCCGT                       |                                                                                           |
| G3-qF3         | TTACTGTTTCCTGGCTCCCA                       | qRT-PCR analysis of 13<br>candidate genes<br>expression                                   |
| G3-qR3         | AACGCACCAATGTCAAAGCT                       |                                                                                           |
| G4-qF2         | AAGCTCTACGAGAAGTCCGG                       |                                                                                           |
| G4-qR2         | ATCTTGAGGTCCGGCATGAA                       |                                                                                           |
| G5-qF2         | TGCCTCCAAATAGCTGTCCT                       |                                                                                           |
| G5-qR2         | TCCTACCAAGTCCACACACC                       |                                                                                           |
| G6-qF2         | TGCCCGTGTTTCTGTCAATC                       |                                                                                           |
| G6-qR2         | AATGGCTCCTCGAACCTTCA                       |                                                                                           |
| G8-qF3         | GTGCCAAGCCAAGACAGAAA                       |                                                                                           |
| G8-qR3         | CGTGCCATGTCCTCAAGAAA                       |                                                                                           |
| G9-qF3         | AGTCCTCAACCTTCTCACGG                       |                                                                                           |
| G9-qR3         | AACCATCGTCTGCTTCCTCA                       |                                                                                           |

|                |                                              |                           |
|----------------|----------------------------------------------|---------------------------|
| G10-qF1        | TGTTGATCAAATGCCGCAA                          |                           |
| G10-qR1        | CAACCAGGCCCTCACATTTT                         |                           |
| G11-qF2        | TCACCCAGGAGCATGTCATT                         |                           |
| G11-qR2        | GGAGAACCCTTTGCACCGAAG                        |                           |
| G13-qF1        | CCCATACCGTTCCCTACTCC                         |                           |
| G13-qR1        | ACCTTCTTGCTGTCGTCGTA                         |                           |
| G15-qF3        | AGGGACAATACGCATGGCTA                         |                           |
| G15-qR3        | TCCAAGCTTCTCTGGAGTGG                         |                           |
| G18-qF3        | CTGATAATGCGCGGGAGTTT                         |                           |
| G18-qR3        | GGTCCAAATGATTCTCCAGG                         |                           |
| G19-qF2        | GGCAAGGGGAGCAAGACTAT                         |                           |
| G19-qR2        | CCGGTATGTGTGGAATGGGA                         |                           |
| G21-qF2        | ATGACGTTCGGCCTCATGTA                         |                           |
| G21-qR2        | CCCAGCCAGTACACCCAG                           |                           |
| ZmActin-qF     | ATGGTCAAGGCCGGTTTTCG                         | qRT-PCR internal control  |
| ZmActin-qR     | TCAGGATGCCTCTCTTGGCC                         |                           |
| pGWC-Smk11-F   | AGCAGGCTTTGACTTTATGGCCGCCGCCTG               | Construct pGWC-Smk11      |
| pGWC-Smk11-R   | TGGGTCTAGAGACTTTCCTTGCTTCTTCCTAGTACTCTCT     |                           |
| pGBKT7-Smk11-F | CATGGAGGCCGAATTCATGGCCGCCGCCTG               | Construct<br>pGBKT7-Smk11 |
| pGBKT7-Smk11-R | GCAGGTGCACGGATCCTCATTGCTTCTTCCTAGTACTCTCT    |                           |
| nLUC-Smk11-F   | CACGGGGGACGAGCTCGGTACCATGGCCGCCGCCTG         | Construct nLUC-Smk11      |
| nLUC-Smk11-R   | ACGCGTACGAGATCTGGTCGACTTGCTTCTTCCTAGTACTCTCT |                           |
| pGWC-3660-F    | AGCAGGCTTTGACTTTATGCTGCCGTCCCTGAA            | Construct pGWC vectors    |
| pGWC-3660-R    | TGGGTCTAGAGACTTTTTAAGACTGCTTCGTTGCGTC        |                           |
| pGWC-2938-F    | AGCAGGCTTTGACTTTATGTATCCTACGTTTACGGCC        |                           |
| pGWC-2938-R    | TGGGTCTAGAGACTTTTTAAATCGCACACAGCATAACC       |                           |

|               |                                           |                             |
|---------------|-------------------------------------------|-----------------------------|
| pGWC-1501-F   | AGCAGGCTTTGACTTTTATGCCTCGCCGCAGCT         |                             |
| pGWC-1501-R   | TGGGTCTAGAGACTTTTTAGACAGACACACCACCACG     |                             |
| pGWC-7104-F   | AGCAGGCTTTGACTTTTATGTCCATGTTAGAAGCTGCTCA  |                             |
| pGWC-7104-R   | TGGGTCTAGAGACTTTTCAGTGTGGTTTCGGTACATAGC   |                             |
| pGADT7-3660-F | GGAGGCCAGTGAATTCATGCTGCCGTCCCTGAA         |                             |
| pGADT7-3660-R | CGAGCTCGATGGATCCTTAAGACTGCTTCGTTGCGTC     |                             |
| pGADT7-2938-F | GGAGGCCAGTGAATTCATGTATCCTACGTTTACGGCC     |                             |
| pGADT7-2938-R | CGAGCTCGATGGATCCTTAAATCGCACACAGCATAACC    |                             |
| pGADT7-1501-F | GGAGGCCAGTGAATTCATGCCTCGCCGCAGCT          |                             |
| pGADT7-1501-R | CGAGCTCGATGGATCCTTAGACAGACACACCACCACG     |                             |
| pGADT7-7104-F | GGAGGCCAGTGAATTCATGTCCATGTTAGAAGCTGCTCA   |                             |
| pGADT7-7104-R | CGAGCTCGATGGATCCTCAGTGTGGTTTCGGTACATAGC   |                             |
| pGADT7-5396-F | GGAGGCCAGTGAATTCATGACGGCTGGCTACATTGTT     |                             |
| pGADT7-5396-R | CGAGCTCGATGGATCCCTACTCAGTGGACTTGACGATGAAG | Construct pGADT7<br>vectors |
| pGADT7-2925-F | GGAGGCCAGTGAATTCATGGCCGCGGAAGGC           |                             |
| pGADT7-2925-R | CGAGCTCGATGGATCCTTACAGAGGTCCAGGGAAGGT     |                             |
| pGADT7-9691-F | GGAGGCCAGTGAATTCATGACGGAGGCCCCGAG         |                             |
| pGADT7-9691-R | CGAGCTCGATGGATCCTTAATCTTTATGCGAATGGGC     |                             |
| pGADT7-7512-F | GGAGGCCAGTGAATTCATGATAATGGCAAATTGACAATG   |                             |
| pGADT7-7512-R | CGAGCTCGATGGATCCTCAGCCAGAGGCAGTCTTCTT     |                             |
| pGADT7-4218-F | GGAGGCCAGTGAATTCATGGCTTCGGCGGCG           |                             |
| pGADT7-4218-R | CGAGCTCGATGGATCCTCAGTGGTGGTCCTTCGTCTC     |                             |
| pGADT7-4738-F | GGAGGCCAGTGAATTCATGTGGCGCCGCCTC           |                             |
| pGADT7-4738-R | CGAGCTCGATGGATCCTTAGTGATGTCCATCATCTTCATC  |                             |
| cLUC-3660-F   | TACGCGTCCCGGGGCGGTACCATGCTGCCGTCCCTGAA    |                             |
| cLUC-3660-R   | TCCTTGTAGTCCATTTGTTGTTAAGACTGCTTCGTTGCGTC | Construct cLUC vectors      |



|               |                                              |                                                               |
|---------------|----------------------------------------------|---------------------------------------------------------------|
| cLUC-2938-F   | TACGCGTCCCGGGGCGGTACCATGTATCCTACGTTTACGGCC   |                                                               |
| cLUC-2938-R   | TCCTTGTAGTCCATTTGTTGTTAAATCGCACACAGCATACC    |                                                               |
| cLUC-1501-F   | TACGCGTCCCGGGGCGGTACCATGCCTCGCCGCAGCT        |                                                               |
| cLUC-1501-R   | TCCTTGTAGTCCATTTGTTGTTAGACAGACACACCACCAG     |                                                               |
| cLUC-7104-F   | TACGCGTCCCGGGGCGGTACCATGTCCATGTTAGAAGCTGCTCA |                                                               |
| cLUC-7104-R   | TCCTTGTAGTCCATTTGTTGTCAGTGTGGTTTCGGTACATAGC  |                                                               |
| pGBKT7-3660-F | CATGGAGGCCGAATTCATGCTGCCGTCCCTGAAC           |                                                               |
| pGBKT7-3660-R | GCAGGTGCACGGATCCTTAAGACTGCTTCGTTGCGTC        |                                                               |
| pGBKT7-2938-F | CATGGAGGCCGAATTCATGTATCCTACGTTTACGGCC        |                                                               |
| pGBKT7-2938-R | GCAGGTGCACGGATCCTTAAATCGCACACAGCATACC        | Construct pGBKT7<br>vectors                                   |
| pGBKT7-1501-F | CATGGAGGCCGAATTCATGCCTCGCCGCAGCT             |                                                               |
| pGBKT7-1501-R | GCAGGTGCACGGATCCTTAGACAGACACACCACCAG         |                                                               |
| pGBKT7-7104-F | CATGGAGGCCGAATTCATGTCCATGTTAGAAGCTGCTCA      |                                                               |
| pGBKT7-7104-R | GCAGGTGCACGGATCCTCAGTGTGGTTTCGGTACATAGC      |                                                               |
| Smk11-CX-F    | CCTCGCAAAGCAAACAGTT                          |                                                               |
| Nos-R2        | GTAACATAGATGACACCGCGC                        | Genotype analysis of<br>transgenic<br>complementation kernels |
| F0.6          | ACACTTGTTCAACTTTGCATACA                      |                                                               |
| R414          | CAGTCTCAACATCTGCGGTG                         |                                                               |
| F61           | AGTATTTGCGGCTACCCTGT                         |                                                               |
| R0.6          | GAGCACCCCTCGTTTTCTGC                         |                                                               |
| cox1-F1       | GGCCCCTCTCTGATAAGGTT                         |                                                               |
| cox1-R1       | GTTAAGGCAAAGCCCAAACA                         |                                                               |
| cox2-F1       | GTCCTACTTCTGGTGCTGCC                         |                                                               |
| cox2-R1       | GAGAATTGCATTTCCGCTTC                         |                                                               |
| cox3-F1       | TCAATCCACTTATTCGTTCCC                        |                                                               |
| cox3-R1       | GTTTACATACAACCGGGGCA                         |                                                               |

|          |                       |
|----------|-----------------------|
| 5396-qF2 | GGTCGGATCCTTTGCCATTG  |
| 5396-qR2 | GCCACCACTCCTTCTCAGAA  |
| 4738-qF2 | ATAGTCGGTTGTCCTGGTGG  |
| 4738-qR2 | TATTGCGAGCAGACTGGACA  |
| 2925-qF1 | AAGGCATTGTTTCACACGCT  |
| 2925-qR1 | TACAGAGGTCCAGGGAAGGT  |
| 9691-qF1 | CGAGCCGTAGGTTGCCTCT   |
| 9691-qR2 | GGCTTGTGTACTTGTCCACC  |
| 7512-qF2 | GTGAAGAGAATGGGAGGGCA  |
| 7512-qR2 | ACGGAGAGTGTACCTTCAA   |
| 4218-qF1 | TGGGAGAAGATCACCTACGC  |
| 4218-qR1 | CGGATGTGCAGATAGGGGTA  |
| 3660-qF2 | AAAGCGACTCCTCCAGAACC  |
| 3660-qR2 | CCAAACCCGGCAAAAAGATCT |
| 2938-qF2 | ATTGGGCTTCCTGGTGAGAA  |
| 2938-qR2 | ACCGAATGCCCTAGAATCCC  |
| 1501-qF1 | TGCTCAAGGTATGGCGTTTG  |
| 1501-qR1 | AGCTTCTGTGGCAAGAGTCT  |
| 7104-qF1 | GTCCATGTTAGAAGCTGCTCA |
| 7104-qR1 | GTCTCTGTGAGCCCAAATGC  |

---

|                       |                                                              |
|-----------------------|--------------------------------------------------------------|
| pMAL-SMK11-F          | TTCAGAATTCGGATCCATGGCCGCCGCCTG                               |
| pMAL-SMK11-HisR       | C GACTCTAGAGGATCCttaATGATGATGATGATGATGTTGCTTCTTCCTAGTACTCTCT |
| pMAL- ZmIMP1A-F0.3    | TTCAGAATTCGGATCCATGCTGCCGTCCCTGAAC                           |
| pMAL- ZmIMP1A-HisR0.3 | C GACTCTAGAGGATCCttaATGATGATGATGATGATGAGACTGCTTCGTTGCGTC     |
| pMAL- ZmIMP1A-R0.3    | C GACTCTAGAGGATCCttaTTAAGACTGCTTCGTTGCGTC                    |
| pMAL- ZmMYB3R-3-F0.3  | TTCAGAATTCGGATCCATGTATCCTACGTTTACGGCC                        |

Construct pMAL vectors

|                            |                                                           |
|----------------------------|-----------------------------------------------------------|
| pMAL-<br>ZmMYB3R-3-HisR0.3 | CGACTCTAGAGGATCCttaATGATGATGATGATGATGAATCGCACACAGCATAACC  |
| pMAL- ZmMYB3R-3-R0.3       | CGACTCTAGAGGATCCttaTTAAATCGCACACAGCATAACC                 |
| pMAL- ZmMFDX1-F0.3         | TTCAGAATTCGGATCCATGTCCATGTTAGAAGCTGCTCA                   |
| pMAL-<br>ZmMFDX1-HisR0.3   | CGACTCTAGAGGATCCttaATGATGATGATGATGATGGTGTGGTTTCGGTACATAGC |
| pMAL- ZmMFDX1-R0.3         | CGACTCTAGAGGATCCttaTCAGTGTGGTTTCGGTACATAGC                |
| pMAL- ZmCOX23-F0.4         | TTCAGAATTCGGATCCATGCCTCGCCGCAGCT                          |
| pMAL- ZmCOX23-HisR0.4      | CGACTCTAGAGGATCCttaATGATGATGATGATGATGGACAGACACACCACCACG   |
| pMAL- ZmCOX23-R0.4         | CGACTCTAGAGGATCCttaTTAGACAGACACACCACCACG                  |
| pMAL- ZmCOX6a-F0.3         | TTCAGAATTCGGATCCATGGCTTCGGCGGCG                           |
| pMAL- ZmCOX6a-R0.3         | CGACTCTAGAGGATCCttaTCAGTGGTGGTCCTTCGTCTC                  |
| pMAL- ZmCOX-X1-F0.3        | TTCAGAATTCGGATCCATGACGGAGGCCCGAG                          |
| pMAL- ZmCOX-X1-R0.3        | CGACTCTAGAGGATCCttaTTAATCTTTATGCGAATGGGC                  |
| pMAL-ZmCOX-X3-F0.4         | TTCAGAATTCGGATCCATGATAATGGCAAATTGACAATG                   |
| pMAL-ZmCOX-X3-R0.4         | CGACTCTAGAGGATCCttaTCAGCCAGAGGCAGTCTTCTT                  |

---

Supplemental Table S2. The expression patterns of 21 candidate genes in a 1 Mb Interval\*

| Gene Name | G1     | G2     | G3     | G4     | G5     | G6     | G7     | G8     | G9     | G10    | G11    | G12    | G13    | G14    | G15    | G16    | G17    | G18    | G19    | G20    | G21    |
|-----------|--------|--------|--------|--------|--------|--------|--------|--------|--------|--------|--------|--------|--------|--------|--------|--------|--------|--------|--------|--------|--------|
| Gene ID   | GRMZ   |
|           | M2G    |
|           | 074239 | 392823 | 032648 | 032910 | 033926 | 034276 | 338853 | 073351 | 374385 | 073017 | 073034 | 073109 | 073114 | 404920 | 105987 | 432697 | 039370 | 142266 | 005199 | 305093 | 305446 |
| Em10      | 0      | 0      | 3.38   | 19.75  | 7.47   | 23.68  | 0      | 3.94   | 50.89  | 2.5    | 1.12   | 0      | 0.95   | 0      | 0.26   | 0      | 0      | 15.98  | 5.25   | 0      | 59.66  |
| Em12      | 0      | 0      | 2.16   | 37     | 6.71   | 23     | 0      | 1.46   | 37.29  | 2.8    | 2.2    | 0      | 2.92   | 0      | 0.76   | 0      | 0      | 10.14  | 4.93   | 0      | 84.85  |
| Em14      | 0      | 0      | 1.14   | 26.22  | 11.75  | 26.97  | 0      | 0.2    | 33.84  | 2.33   | 2.31   | 0      | 1.12   | 0      | 0      | 0      | 0      | 9.71   | 7.07   | 0      | 64.48  |
| Em16      | 0      | 0      | 2.08   | 26.55  | 7.16   | 23.22  | 0      | 0.75   | 36.49  | 1.63   | 1.35   | 0      | 2.8    | 0      | 0.17   | 0      | 0      | 10.53  | 5.67   | 0      | 117.31 |
| Em18      | 0      | 0      | 1.25   | 35.96  | 11.99  | 26.2   | 0      | 0.28   | 47.08  | 2.29   | 1.96   | 0      | 1.44   | 0      | 0.19   | 0      | 0      | 10.9   | 4.66   | 0      | 131.35 |
| Em20      | 0      | 0      | 0.42   | 26.82  | 13.12  | 20.34  | 0      | 0.3    | 42.01  | 2.6    | 2      | 0      | 2.21   | 0      | 0      | 0      | 0      | 10.62  | 3.53   | 0      | 65.96  |
| Em22      | 0      | 0      | 0.98   | 27.61  | 14.89  | 17.75  | 0      | 1.31   | 33.43  | 2.19   | 1.6    | 0      | 1.7    | 0      | 0.42   | 0      | 0      | 7.83   | 6.27   | 0      | 369.53 |
| Em24      | 0      | 0      | 0.42   | 37.94  | 16.96  | 23.71  | 0      | 1.51   | 27.33  | 2.28   | 0.94   | 0      | 1.94   | 0      | 0.03   | 0      | 0      | 5.64   | 6.02   | 0      | 321.41 |
| Em26      | 0      | 0      | 0.42   | 41.76  | 14.98  | 14.28  | 0      | 4.96   | 19.27  | 1.47   | 1.96   | 0      | 1.05   | 0      | 0.26   | 0      | 0      | 4.46   | 4.96   | 0      | 910.81 |
| Em28      | 0      | 0      | 0.6    | 42.79  | 16.69  | 14.84  | 0      | 2.91   | 28.56  | 1.57   | 0.27   | 0      | 0.58   | 0      | 0.79   | 0      | 0      | 5.03   | 4.24   | 0      | 579.22 |
| Em30      | 0      | 0      | 0.14   | 31.63  | 17.8   | 16.12  | 0      | 1.96   | 33.68  | 2      | 1.7    | 0      | 1.62   | 0      | 0.21   | 0      | 0      | 7.53   | 5.06   | 0      | 276.1  |
| Em32      | 0      | 0      | 0.1    | 21.37  | 25.42  | 18.17  | 0      | 2.58   | 39.66  | 2.14   | 2.24   | 0      | 0.78   | 0      | 0.04   | 0      | 0      | 7.4    | 4.34   | 0      | 251.21 |
| Em34      | 0      | 0      | 0.3    | 20.79  | 17.81  | 17.97  | 0      | 9.78   | 27.48  | 1.81   | 1.46   | 0      | 2.41   | 0      | 0.27   | 0      | 0      | 7.41   | 4.21   | 0      | 854.19 |
| Em36      | 0      | 0      | 0.09   | 20.88  | 23.6   | 18.58  | 0      | 12.1   | 29.35  | 1.72   | 1.92   | 0      | 12.48  | 0      | 0.31   | 0      | 0      | 5.07   | 4.06   | 0      | 638.68 |
| Em38      | 0      | 0      | 0.19   | 14.1   | 22.07  | 19.49  | 0      | 16.59  | 28.58  | 1.85   | 1.57   | 0      | 4.16   | 0      | 0.23   | 0      | 0      | 4.93   | 4.32   | 0      | 777.58 |
| En6       | 0      | 0      | 0.51   | 11.18  | 6.5    | 17.45  | 0      | 0.01   | 62.6   | 1.82   | 0.23   | 0      | 0      | 0      | 0.43   | 0      | 0      | 15.21  | 4.33   | 0      | 0.7    |
| En8       | 0      | 0      | 0.16   | 8.21   | 6.35   | 22.27  | 0      | 0.1    | 64.82  | 1.66   | 0.84   | 0      | 0      | 0      | 0.3    | 0      | 0      | 14.95  | 5.57   | 0      | 0.36   |
| En10      | 0      | 0      | 0.09   | 0.92   | 7.49   | 16.69  | 0      | 0      | 40.9   | 1.4    | 0.63   | 0      | 0      | 0      | 0.1    | 0      | 0      | 11.82  | 2.87   | 0      | 2.26   |
| En12      | 0      | 0      | 0      | 0.28   | 6.34   | 10.86  | 0      | 0.02   | 15.88  | 0.93   | 0.29   | 0      | 0      | 0      | 0.1    | 0      | 0      | 4.8    | 2.48   | 0      | 1.66   |
| En14      | 0      | 0      | 0.01   | 0.32   | 4.87   | 11.06  | 0      | 0      | 11.37  | 0.56   | 0.59   | 0.21   | 0      | 0      | 0      | 0      | 0      | 4.89   | 2.06   | 0      | 17.19  |

|      |   |   |      |       |       |       |   |       |       |      |      |      |      |      |      |      |      |       |      |      |             |
|------|---|---|------|-------|-------|-------|---|-------|-------|------|------|------|------|------|------|------|------|-------|------|------|-------------|
| En16 | 0 | 0 | 0    | 0.37  | 4.54  | 15.23 | 0 | 0     | 12.88 | 0.84 | 0.57 | 0    | 0    | 0    | 0    | 0    | 0    | 4.86  | 1.69 | 0    | 14.54       |
| En18 | 0 | 0 | 0.06 | 0.57  | 5.71  | 17.28 | 0 | 0     | 12.39 | 0.81 | 1.44 | 0    | 0    | 0    | 0.03 | 0    | 0    | 4.88  | 2.72 | 0    | 50.77       |
| En20 | 0 | 0 | 0.09 | 0.49  | 4.17  | 15.23 | 0 | 0.12  | 14.12 | 0.94 | 0.6  | 0    | 0    | 0    | 0.08 | 0    | 0    | 4.78  | 3.01 | 0    | 34.43       |
| En22 | 0 | 0 | 0.04 | 1.05  | 4.38  | 9.83  | 0 | 0.02  | 11.8  | 0.6  | 0.73 | 0    | 0.51 | 0    | 0.14 | 0    | 0    | 5.23  | 2.51 | 0    | 28.05       |
| En24 | 0 | 0 | 0    | 1.48  | 4.89  | 10.77 | 0 | 0.02  | 10.2  | 0.75 | 1.17 | 0    | 0.03 | 0    | 0.07 | 0    | 0    | 5.28  | 3.41 | 0    | 53.37       |
| En26 | 0 | 0 | 0    | 1.64  | 5.67  | 12.13 | 0 | 0.34  | 7.51  | 0.35 | 0.54 | 0    | 0.35 | 0    | 0    | 0    | 0    | 4.62  | 2.72 | 0    | 164.23      |
| En28 | 0 | 0 | 0    | 3.48  | 5.76  | 9.69  | 0 | 1.19  | 6.02  | 0.4  | 3.07 | 0    | 0.23 | 0    | 0.59 | 0    | 0    | 1.42  | 1.54 | 0    | 638.25      |
| En30 | 0 | 0 | 0    | 1.55  | 4.9   | 13.85 | 0 | 0.71  | 10.49 | 0.36 | 1    | 0    | 0    | 0    | 0.26 | 0    | 0    | 4.9   | 2.71 | 0.13 | 247.33      |
| En32 | 0 | 0 | 0.08 | 7.74  | 10.77 | 17.1  | 0 | 4.16  | 12.4  | 1.08 | 2.39 | 0    | 0    | 0    | 0.03 | 0    | 0    | 4.35  | 2.84 | 0    | 770.18      |
| En34 | 0 | 0 | 0    | 10.21 | 13.44 | 22.86 | 0 | 5.48  | 15.2  | 1.28 | 2.08 | 0    | 0.34 | 0    | 0.4  | 0    | 0    | 4.97  | 3.18 | 0    | 634.11      |
| En36 | 0 | 0 | 0    | 16.54 | 10.16 | 12.81 | 0 | 11.12 | 10.31 | 0.58 | 0.77 | 0    | 0    | 0    | 0.09 | 0    | 0    | 2.52  | 1.58 | 0    | 1696.8<br>4 |
| En38 | 0 | 0 | 0    | 24.5  | 18.49 | 16.27 | 0 | 16    | 12.36 | 1.4  | 0.73 | 0    | 0.09 | 0    | 0    | 0    | 0    | 4.19  | 1.97 | 0    | 1944.7<br>5 |
| S0   | 0 | 0 | 1.71 | 34.36 | 23.72 | 40.12 | 0 | 2.3   | 25.43 | 3.36 | 6.21 | 0    | 1.06 | 0    | 3.36 | 0    | 0.13 | 10.62 | 8.49 | 0    | 0           |
| S2   | 0 | 0 | 0.79 | 33.96 | 21.69 | 27.92 | 0 | 2.47  | 28.52 | 1.96 | 7.12 | 0    | 1.18 | 0    | 4.17 | 0.22 | 0    | 8.48  | 7.74 | 0    | 1.15        |
| S3   | 0 | 0 | 1.29 | 47.73 | 12.69 | 31.26 | 0 | 1.33  | 24.9  | 2.03 | 4.48 | 0    | 0.4  | 0    | 4.03 | 0.42 | 0.13 | 8.14  | 4.71 | 0    | 0.13        |
| S4   | 0 | 0 | 1.29 | 35.61 | 12.06 | 30.06 | 0 | 1.06  | 23.85 | 3.86 | 3.39 | 0    | 0.13 | 0    | 3.34 | 0.7  | 0    | 10.05 | 5.83 | 0    | 0.53        |
| S6   | 0 | 0 | 0.76 | 18.41 | 10.12 | 30.49 | 0 | 0.7   | 24    | 2.57 | 4.46 | 0    | 0    | 0    | 2.04 | 0    | 0    | 7.12  | 6.41 | 0    | 0.38        |
| S8   | 0 | 0 | 0.54 | 8.28  | 12.33 | 27.1  | 0 | 0.2   | 38.49 | 1.6  | 1.95 | 0    | 0    | 0    | 1.65 | 0    | 0    | 11.65 | 7.39 | 0    | 0.37        |
| S10  | 0 | 0 | 0.31 | 3.95  | 6.86  | 21.3  | 0 | 0.05  | 32.53 | 1.33 | 1.69 | 0    | 0    | 0    | 1.1  | 0    | 0    | 10.62 | 4.41 | 0    | 1.97        |
| S12  | 0 | 0 | 0.55 | 5.27  | 6.47  | 15.35 | 0 | 0.12  | 14.52 | 0.52 | 0.93 | 0    | 0.16 | 0.05 | 0.65 | 0    | 0.08 | 4.93  | 4    | 0    | 5.56        |
| S14  | 0 | 0 | 0.07 | 5.3   | 5.07  | 12.2  | 0 | 0.09  | 13.43 | 0.84 | 1.17 | 0    | 0.16 | 0    | 0.21 | 0    | 0    | 4.26  | 3.37 | 0    | 15.55       |
| S16  | 0 | 0 | 0.29 | 6.59  | 7.74  | 19.79 | 0 | 0.11  | 21.61 | 1.85 | 0.91 | 0.07 | 0.26 | 0    | 0.15 | 0    | 0    | 6.45  | 4.7  | 0    | 17.28       |
| S18  | 0 | 0 | 0.19 | 7.08  | 6.4   | 18.45 | 0 | 0.01  | 19.22 | 1.27 | 0.71 | 0    | 0.1  | 0    | 0.79 | 0    | 0    | 6.02  | 3.87 | 0    | 40.26       |



|        |      |   |      |       |       |       |   |        |       |      |      |      |       |      |       |      |      |       |      |      |         |
|--------|------|---|------|-------|-------|-------|---|--------|-------|------|------|------|-------|------|-------|------|------|-------|------|------|---------|
| S20    | 0    | 0 | 0.14 | 8.27  | 6.46  | 18.09 | 0 | 0.17   | 19.99 | 1.18 | 1.64 | 0    | 0.7   | 0    | 0.41  | 0.09 | 0    | 6.24  | 4.03 | 0    | 59.44   |
| S22    | 0    | 0 | 0.16 | 8.67  | 13.79 | 17.99 | 0 | 0.27   | 17.03 | 1.3  | 0.94 | 0    | 0     | 0    | 0.57  | 0    | 0    | 4.94  | 6.37 | 0    | 59.22   |
| S24    | 0    | 0 | 0.3  | 7.28  | 5.24  | 13.75 | 0 | 0.18   | 13.84 | 0.81 | 1.82 | 0    | 0.19  | 0.05 | 0.6   | 0    | 0    | 3.64  | 3.52 | 0    | 79.63   |
| S26    | 0    | 0 | 0.09 | 9.58  | 7.67  | 17.13 | 0 | 0.26   | 16.31 | 1.06 | 3.39 | 0    | 0     | 0    | 1.48  | 0    | 0    | 4.74  | 4.92 | 0    | 89.89   |
| S28    | 0    | 0 | 0.04 | 10.34 | 9.74  | 15.89 | 0 | 1.62   | 17.89 | 1.46 | 3.16 | 0    | 0.55  | 0    | 0.72  | 0    | 0    | 4.51  | 3.73 | 0    | 196.07  |
| S30    | 0    | 0 | 0.36 | 22.81 | 12.31 | 14.95 | 0 | 13.48  | 19.77 | 1.11 | 2.48 | 0.64 | 13.55 | 0    | 1.59  | 0    | 0    | 5.18  | 4.51 | 0    | 1049.78 |
| S32    | 0    | 0 | 0.12 | 16.34 | 17.6  | 25.37 | 0 | 4.58   | 28.67 | 2.99 | 1.03 | 0    | 7.91  | 0    | 2.59  | 0    | 0    | 5.71  | 4.24 | 0    | 350.28  |
| S34    | 0    | 0 | 0.13 | 20.61 | 15.46 | 19.05 | 0 | 10.68  | 21.06 | 2.54 | 1.1  | 0    | 7.23  | 0    | 2     | 0    | 0    | 5.58  | 4.73 | 0    | 524.02  |
| S36    | 0    | 0 | 0.12 | 14.31 | 16.97 | 22.56 | 0 | 6.22   | 25.29 | 1.44 | 0.83 | 0    | 6.32  | 0    | 0.38  | 0    | 0    | 7.01  | 3.74 | 0    | 198.88  |
| S38    | 0    | 0 | 0.22 | 19.83 | 16.09 | 18.99 | 0 | 21.19  | 19.1  | 1.56 | 1.44 | 0    | 6.06  | 0    | 0.97  | 0    | 0    | 5.4   | 4.08 | 0    | 744.77  |
| Shoots | 0.15 | 0 | 0.96 | 5.31  | 6.89  | 8.97  | 0 | 44.17  | 8.62  | 0.75 | 0.33 | 0    | 2     | 0    | 1.05  | 0    | 0    | 1.13  | 3.26 | 0.08 | 0.29    |
| Roots  | 0.32 | 0 | 0.79 | 6.67  | 6.7   | 5     | 0 | 0.19   | 8.35  | 0.69 | 0.28 | 0    | 3.27  | 0    | 20.93 | 0    | 0.06 | 1.44  | 5.57 | 0.08 | 0.16    |
| Leaf 1 | 0    | 0 | 2.67 | 12.74 | 5     | 4.31  | 0 | 100.49 | 8.7   | 0.84 | 0.31 | 0    | 0.2   | 0    | 0.13  | 0.08 | 0    | 3.6   | 2.5  | 0    | 1.24    |
| Leaf 2 | 0.12 | 0 | 0.89 | 13.75 | 9.09  | 8.25  | 0 | 242.2  | 5.09  | 0.42 | 0.75 | 0    | 0.08  | 0    | 0.2   | 0    | 0    | 0.89  | 2.61 | 0    | 0.05    |
| Leaf 3 | 0    | 0 | 3.54 | 1.24  | 4.32  | 4.85  | 0 | 170.59 | 1.68  | 0.26 | 0.37 | 0    | 0     | 0    | 0.06  | 0    | 0    | 0.35  | 2.56 | 0    | 0       |
| Leaf 4 | 0    | 0 | 3.92 | 1.17  | 1.89  | 4.74  | 0 | 147.98 | 3.7   | 0.18 | 0.28 | 0    | 0     | 0    | 0.21  | 0    | 0    | 0.62  | 2.08 | 0    | 0       |
| Leaf 5 | 0    | 0 | 3.01 | 5.13  | 2.8   | 7.3   | 0 | 85.24  | 3.42  | 0.15 | 0.7  | 0    | 0.06  | 0    | 0     | 0.08 | 0    | 0.41  | 2.41 | 0    | 0       |
| Leaf 6 | 0    | 0 | 1.97 | 7.98  | 8.4   | 16.99 | 0 | 71.06  | 26.43 | 2.04 | 1.46 | 0    | 0     | 0    | 0.16  | 0    | 0    | 8.58  | 3.09 | 0    | 0.06    |
| Leaf 7 | 0    | 0 | 2.33 | 7.5   | 7.75  | 16.78 | 0 | 79.21  | 25.24 | 2.18 | 0.91 | 0    | 0.09  | 0    | 0.34  | 0    | 0    | 8.96  | 3.27 | 0    | 0       |
| SAM 1  | 0    | 0 | 3.94 | 35.73 | 5.43  | 14.25 | 0 | 1.91   | 37.54 | 3.51 | 1.25 | 0    | 0     | 0    | 0.3   | 0.06 | 0    | 15.64 | 3.39 | 0    | 0.2     |
| SAM 2  | 0    | 0 | 3.02 | 32.82 | 5.31  | 19.02 | 0 | 2.06   | 45.25 | 3.34 | 1.2  | 0    | 0.29  | 0    | 0.23  | 0    | 0    | 16.33 | 2.86 | 0    | 0.12    |
| SAM 3  | 0    | 0 | 1.41 | 0.33  | 1.6   | 6.82  | 0 | 0.18   | 10.44 | 0.97 | 0    | 0    | 0     | 0    | 0     | 0    | 0    | 2.92  | 0.76 | 0    | 0       |
| Ear 1  | 0    | 0 | 5.81 | 27.87 | 3.81  | 17.56 | 0 | 2.32   | 41.68 | 2.69 | 1.22 | 0    | 5.41  | 0    | 1.18  | 0    | 0    | 16.6  | 2.93 | 0    | 0.07    |
| Ear 2  | 0    | 0 | 5.49 | 20.79 | 2.76  | 10.25 | 0 | 1.89   | 25.26 | 2.82 | 0.82 | 0    | 4.77  | 0    | 1.23  | 0    | 0    | 6.33  | 1.6  | 0    | 0.2     |

|          |   |   |      |       |       |       |   |       |       |      |      |      |       |      |      |      |      |       |      |      |      |
|----------|---|---|------|-------|-------|-------|---|-------|-------|------|------|------|-------|------|------|------|------|-------|------|------|------|
| Tassel 1 | 0 | 0 | 5.36 | 25.61 | 6.86  | 17.96 | 0 | 6.31  | 41.31 | 1.78 | 0.8  | 0    | 8.03  | 0    | 1.45 | 0    | 0    | 11.93 | 3.42 | 0    | 0    |
| Tassel 2 | 0 | 0 | 5.87 | 26.41 | 6.86  | 17.81 | 0 | 6.05  | 41.78 | 2.26 | 0.96 | 0    | 7.02  | 0.06 | 1.12 | 0    | 0    | 10.37 | 3.7  | 0    | 0    |
| Tassel 3 | 0 | 0 | 5.37 | 21.19 | 5.92  | 12.9  | 0 | 5.27  | 29.58 | 2.6  | 0.95 | 0.14 | 9.04  | 0    | 1.17 | 0    | 0    | 5.69  | 2.47 | 0    | 0    |
| Tassel 4 | 0 | 0 | 1.46 | 20.74 | 5.53  | 9.83  | 0 | 24.22 | 7.61  | 0.97 | 0.83 | 0.18 | 23.09 | 0    | 0.63 | 0    | 0    | 1.63  | 7.24 | 0.14 | 0    |
| Tassel 5 | 0 | 0 | 1.46 | 24.17 | 5.88  | 8.08  | 0 | 20.49 | 5.28  | 1.04 | 0.83 | 0    | 25.7  | 0    | 0.8  | 0    | 0    | 1.68  | 5.29 | 0.23 | 0    |
| Cob 1    | 0 | 0 | 7.8  | 50.67 | 3.53  | 17.44 | 0 | 9.53  | 16.33 | 2.65 | 0.9  | 0    | 5.98  | 0    | 1.89 | 0.24 | 0    | 5.29  | 3.79 | 0    | 0.17 |
| Cob 2    | 0 | 0 | 7.45 | 55.34 | 3.41  | 14.62 | 0 | 20.56 | 15.24 | 2.26 | 0.72 | 0.58 | 35.34 | 0    | 2.85 | 0.4  | 0    | 6.43  | 3.71 | 0    | 0.26 |
| Silk     | 0 | 0 | 5.22 | 42.6  | 7.2   | 14.53 | 0 | 32.73 | 6.43  | 1.4  | 2.16 | 0    | 3.36  | 0    | 0.66 | 0    | 0.06 | 1.2   | 5.87 | 0    | 1.85 |
| Anthers  | 0 | 0 | 1.42 | 1.84  | 14.85 | 2.35  | 0 | 1.58  | 0.55  | 0.1  | 0.2  | 0    | 0.04  | 0    | 1.37 | 0    | 0    | 0.13  | 1.64 | 0    | 0    |
| Ovule    | 0 | 0 | 6.53 | 81.75 | 4.69  | 11.61 | 0 | 21.27 | 10.26 | 2.09 | 1.03 | 0    | 28.42 | 0    | 1.28 | 0.49 | 0    | 3.2   | 3.47 | 0.09 | 0.27 |
| Pollen   | 0 | 0 | 0.88 | 0.08  | 8.31  | 0.18  | 0 | 0.02  | 0.06  | 0.03 | 0    | 0    | 0.04  | 0    | 0    | 0    | 0    | 0     | 0.78 | 0    | 0    |

**Supplemental Table S3. Segregating ratio of heterozygous *smk11-cas9*+ ears.**

| Ear No.       | No. (NS) | No. (MS) | Ratio           |                |                 |
|---------------|----------|----------|-----------------|----------------|-----------------|
|               |          |          | No.(NS)/No.(MS) | $\chi^2$ value | $\chi^2$ (0.05) |
| smk11-cas9-1  | 216      | 66       | 3.27            | 0.3            | 3.841           |
| smk11-cas9-2  | 231      | 96       | 2.41            | 3.08           |                 |
| smk11-cas9-3  | 247      | 64       | 3.86            | 3.01           |                 |
| smk11-cas9-4  | 175      | 51       | 3.43            | 0.59           |                 |
| smk11-cas9-5  | 237      | 71       | 3.34            | 0.52           |                 |
| smk11-cas9-6  | 279      | 88       | 3.17            | 0.15           |                 |
| smk11-cas9-7  | 269      | 78       | 3.45            | 1.05           |                 |
| smk11-cas9-8  | 178      | 63       | 2.83            | 0.11           |                 |
| smk11-cas9-9  | 276      | 72       | 3.83            | 3.22           |                 |
| smk11-cas9-10 | 299      | 80       | 3.74            | 2.86           |                 |

NS, normal seeds, MS, mutant seeds.

**Supplemental Table S4. Complementation statistics (15:1) of *smk11* mutation with *Smk11* transgene.**

| Ear No. | No.(NS) | No.(MS) | Ratio<br>No.(NS) / No.(MS) | $\chi^2$ value | $\chi^2$ (0.05) |
|---------|---------|---------|----------------------------|----------------|-----------------|
| 536-1   | 286     | 21      | 13.62                      | 0.183          | 3.841           |
| 536-4   | 348     | 24      | 14.50                      | 0.026          |                 |
| 536-12  | 220     | 17      | 12.94                      | 0.345          |                 |
| 536-15  | 257     | 21      | 12.24                      | 0.807          |                 |
| 536-16  | 331     | 19      | 17.42                      | 0.403          |                 |
| 537-5   | 454     | 22      | 20.64                      | 2.154          |                 |
| 537-10  | 437     | 29      | 15.07                      | 0.001          |                 |
| 537-11  | 391     | 26      | 15.04                      | 0.000          |                 |
| 537-12  | 396     | 27      | 14.67                      | 0.013          |                 |
| 537-13  | 239     | 13      | 18.38                      | 0.512          |                 |

536-1, 536-4, 536-12, 536-15 and 536-16 lines were from the cross between homozygous mutant *smk11/smk11* (maternal parent) and the transgenic T0 lines (male parent) ; 537-5, 537-10, 536-11, 536-12 and 536-13 lines were from the cross between the transgenic T0 lines (maternal parent) and homozygous mutant *smk11/smk11* (male parent). NS, normal seeds, MS, mutant seeds.

**Supplemental Table S5. List of SMK11-interacting proteins identified by Y2H, LUC and BIFC assays.**

| Number | Gene ID        | Gene Name | Annotation                                  |
|--------|----------------|-----------|---------------------------------------------|
| 1      | GRMZM5G833660  | ZmIMP1A   | Mitochondrial ATP-independent protease      |
| 2      | GRMZM2G142938  | ZmMYB3R-3 | Peptidase S24/S26A/S26B/S26C family protein |
| 3      | GRMZM2G031501  | ZmCOX23   | Twin CX9C domain protein.                   |
| 4      | Zm00001d037104 | ZmMFDX1   | Mitochondrial ferredoxin 1                  |
